# Supplementary material for: Functional Polymorphisms of CHRNA3 Predict Risks of Chronic Obstructive Pulmonary Disease and Lung Cancer in Chinese
Source: PLoS One. 2012 Oct 3;7(10):e46071. doi: 10.1371/journal.pone.0046071 (PMC3463594; doi:10.1371/journal.pone.0046071)
Supplement: File S1 — The self-made excel file to search the shared loci by COPD and lung cancer based on the data of published GWAS in COPD or lung cancer. (XLS) [file pone.0046071.s010.xls]

## Sheet: search with SNP
	for lung cancer	result from lung cancer association studies
	SNP_rs	SNP	P Value	Cancer	Population and Source	PMID
	rs1051730	rs1051730	0.289	lung adenocarcinoma	Japanese and Korean	20871597
	for COPD	result from COPD association studies
	SNP_rs	SNP	P1 value	Source1	Trait or Populationg	PMID
	rs1051730	rs1051730	2.80x10-6	Primary	COPD and white ethnicity	#REF!

## Sheet: search shared SNP
No	shared SNP for both lung cancer and COPD
82	rs1051730
197	rs1051730
274	rs1051730
352	rs1051730
369	rs1051730
374	rs1051730
379	rs1051730
384	rs1051730
386	rs1051730
602	rs1051730
625	rs1051730
201	rs1394371
278	rs1394371
205	rs1996371
282	rs1996371
207	rs4887077
284	rs4887077
86	rs6495309
200	rs6495309
277	rs6495309
80	rs667282
78	rs8034191
198	rs8034191
275	rs8034191
351	rs8034191
387	rs8034191
609	rs8034191
612	rs8034191
616	rs8034191
627	rs8034191
1	#N/A
2	#N/A
3	#N/A
4	#N/A
5	#N/A
6	#N/A
7	#N/A
8	#N/A
9	#N/A
10	#N/A
11	#N/A
12	#N/A
13	#N/A
14	#N/A
15	#N/A
16	#N/A
17	#N/A
18	#N/A
19	#N/A
20	#N/A
21	#N/A
22	#N/A
23	#N/A
24	#N/A
25	#N/A
26	#N/A
27	#N/A
28	#N/A
29	#N/A
30	#N/A
31	#N/A
32	#N/A
33	#N/A
34	#N/A
35	#N/A
36	#N/A
37	#N/A
38	#N/A
39	#N/A
40	#N/A
41	#N/A
42	#N/A
43	#N/A
44	#N/A
45	#N/A
46	#N/A
47	#N/A
48	#N/A
49	#N/A
50	#N/A
51	#N/A
52	#N/A
53	#N/A
54	#N/A
55	#N/A
56	#N/A
57	#N/A
58	#N/A
59	#N/A
60	#N/A
61	#N/A
62	#N/A
63	#N/A
64	#N/A
65	#N/A
66	#N/A
67	#N/A
68	#N/A
69	#N/A
70	#N/A
71	#N/A
72	#N/A
73	#N/A
74	#N/A
75	#N/A
76	#N/A
77	#N/A
79	#N/A
81	#N/A
83	#N/A
84	#N/A
85	#N/A
87	#N/A
88	#N/A
89	#N/A
90	#N/A
91	#N/A
92	#N/A
93	#N/A
94	#N/A
95	#N/A
96	#N/A
97	#N/A
98	#N/A
99	#N/A
100	#N/A
101	#N/A
102	#N/A
103	#N/A
104	#N/A
105	#N/A
106	#N/A
107	#N/A
108	#N/A
109	#N/A
110	#N/A
111	#N/A
112	#N/A
113	#N/A
114	#N/A
115	#N/A
116	#N/A
117	#N/A
118	#N/A
119	#N/A
120	#N/A
121	#N/A
122	#N/A
123	#N/A
124	#N/A
125	#N/A
126	#N/A
127	#N/A
128	#N/A
129	#N/A
130	#N/A
131	#N/A
132	#N/A
133	#N/A
134	#N/A
135	#N/A
136	#N/A
137	#N/A
138	#N/A
139	#N/A
140	#N/A
141	#N/A
142	#N/A
143	#N/A
144	#N/A
145	#N/A
146	#N/A
147	#N/A
148	#N/A
149	#N/A
150	#N/A
151	#N/A
152	#N/A
153	#N/A
154	#N/A
155	#N/A
156	#N/A
157	#N/A
158	#N/A
159	#N/A
160	#N/A
161	#N/A
162	#N/A
163	#N/A
164	#N/A
165	#N/A
166	#N/A
167	#N/A
168	#N/A
169	#N/A
170	#N/A
171	#N/A
172	#N/A
173	#N/A
174	#N/A
175	#N/A
176	#N/A
177	#N/A
178	#N/A
179	#N/A
180	#N/A
181	#N/A
182	#N/A
183	#N/A
184	#N/A
185	#N/A
186	#N/A
187	#N/A
188	#N/A
189	#N/A
190	#N/A
191	#N/A
192	#N/A
193	#N/A
194	#N/A
195	#N/A
196	#N/A
199	#N/A
202	#N/A
203	#N/A
204	#N/A
206	#N/A
208	#N/A
209	#N/A
210	#N/A
211	#N/A
212	#N/A
213	#N/A
214	#N/A
215	#N/A
216	#N/A
217	#N/A
218	#N/A
219	#N/A
220	#N/A
221	#N/A
222	#N/A
223	#N/A
224	#N/A
225	#N/A
226	#N/A
227	#N/A
228	#N/A
229	#N/A
230	#N/A
231	#N/A
232	#N/A
233	#N/A
234	#N/A
235	#N/A
236	#N/A
237	#N/A
238	#N/A
239	#N/A
240	#N/A
241	#N/A
242	#N/A
243	#N/A
244	#N/A
245	#N/A
246	#N/A
247	#N/A
248	#N/A
249	#N/A
250	#N/A
251	#N/A
252	#N/A
253	#N/A
254	#N/A
255	#N/A
256	#N/A
257	#N/A
258	#N/A
259	#N/A
260	#N/A
261	#N/A
262	#N/A
263	#N/A
264	#N/A
265	#N/A
266	#N/A
267	#N/A
268	#N/A
269	#N/A
270	#N/A
271	#N/A
272	#N/A
273	#N/A
276	#N/A
279	#N/A
280	#N/A
281	#N/A
283	#N/A
285	#N/A
286	#N/A
287	#N/A
288	#N/A
289	#N/A
290	#N/A
291	#N/A
292	#N/A
293	#N/A
294	#N/A
295	#N/A
296	#N/A
297	#N/A
298	#N/A
299	#N/A
300	#N/A
301	#N/A
302	#N/A
303	#N/A
304	#N/A
305	#N/A
306	#N/A
307	#N/A
308	#N/A
309	#N/A
310	#N/A
311	#N/A
312	#N/A
313	#N/A
314	#N/A
315	#N/A
316	#N/A
317	#N/A
318	#N/A
319	#N/A
320	#N/A
321	#N/A
322	#N/A
323	#N/A
324	#N/A
325	#N/A
326	#N/A
327	#N/A
328	#N/A
329	#N/A
330	#N/A
331	#N/A
332	#N/A
333	#N/A
334	#N/A
335	#N/A
336	#N/A
337	#N/A
338	#N/A
339	#N/A
340	#N/A
341	#N/A
342	#N/A
343	#N/A
344	#N/A
345	#N/A
346	#N/A
347	#N/A
348	#N/A
349	#N/A
350	#N/A
353	#N/A
354	#N/A
355	#N/A
356	#N/A
357	#N/A
358	#N/A
359	#N/A
360	#N/A
361	#N/A
362	#N/A
363	#N/A
364	#N/A
365	#N/A
366	#N/A
367	#N/A
368	#N/A
370	#N/A
371	#N/A
372	#N/A
373	#N/A
375	#N/A
376	#N/A
377	#N/A
378	#N/A
380	#N/A
381	#N/A
382	#N/A
383	#N/A
385	#N/A
388	#N/A
389	#N/A
390	#N/A
391	#N/A
392	#N/A
393	#N/A
394	#N/A
395	#N/A
396	#N/A
397	#N/A
398	#N/A
399	#N/A
400	#N/A
401	#N/A
402	#N/A
403	#N/A
404	#N/A
405	#N/A
406	#N/A
407	#N/A
408	#N/A
409	#N/A
410	#N/A
411	#N/A
412	#N/A
413	#N/A
414	#N/A
415	#N/A
416	#N/A
417	#N/A
418	#N/A
419	#N/A
420	#N/A
421	#N/A
422	#N/A
423	#N/A
424	#N/A
425	#N/A
426	#N/A
427	#N/A
428	#N/A
429	#N/A
430	#N/A
431	#N/A
432	#N/A
433	#N/A
434	#N/A
435	#N/A
436	#N/A
437	#N/A
438	#N/A
439	#N/A
440	#N/A
441	#N/A
442	#N/A
443	#N/A
444	#N/A
445	#N/A
446	#N/A
447	#N/A
448	#N/A
449	#N/A
450	#N/A
451	#N/A
452	#N/A
453	#N/A
454	#N/A
455	#N/A
456	#N/A
457	#N/A
458	#N/A
459	#N/A
460	#N/A
461	#N/A
462	#N/A
463	#N/A
464	#N/A
465	#N/A
466	#N/A
467	#N/A
468	#N/A
469	#N/A
470	#N/A
471	#N/A
472	#N/A
473	#N/A
474	#N/A
475	#N/A
476	#N/A
477	#N/A
478	#N/A
479	#N/A
480	#N/A
481	#N/A
482	#N/A
483	#N/A
484	#N/A
485	#N/A
486	#N/A
487	#N/A
488	#N/A
489	#N/A
490	#N/A
491	#N/A
492	#N/A
493	#N/A
494	#N/A
495	#N/A
496	#N/A
497	#N/A
498	#N/A
499	#N/A
500	#N/A
501	#N/A
502	#N/A
503	#N/A
504	#N/A
505	#N/A
506	#N/A
507	#N/A
508	#N/A
509	#N/A
510	#N/A
511	#N/A
512	#N/A
513	#N/A
514	#N/A
515	#N/A
516	#N/A
517	#N/A
518	#N/A
519	#N/A
520	#N/A
521	#N/A
522	#N/A
523	#N/A
524	#N/A
525	#N/A
526	#N/A
527	#N/A
528	#N/A
529	#N/A
530	#N/A
531	#N/A
532	#N/A
533	#N/A
534	#N/A
535	#N/A
536	#N/A
537	#N/A
538	#N/A
539	#N/A
540	#N/A
541	#N/A
542	#N/A
543	#N/A
544	#N/A
545	#N/A
546	#N/A
547	#N/A
548	#N/A
549	#N/A
550	#N/A
551	#N/A
552	#N/A
553	#N/A
554	#N/A
555	#N/A
556	#N/A
557	#N/A
558	#N/A
559	#N/A
560	#N/A
561	#N/A
562	#N/A
563	#N/A
564	#N/A
565	#N/A
566	#N/A
567	#N/A
568	#N/A
569	#N/A
570	#N/A
571	#N/A
572	#N/A
573	#N/A
574	#N/A
575	#N/A
576	#N/A
577	#N/A
578	#N/A
579	#N/A
580	#N/A
581	#N/A
582	#N/A
583	#N/A
584	#N/A
585	#N/A
586	#N/A
587	#N/A
588	#N/A
589	#N/A
590	#N/A
591	#N/A
592	#N/A
593	#N/A
594	#N/A
595	#N/A
596	#N/A
597	#N/A
598	#N/A
599	#N/A
600	#N/A
601	#N/A
603	#N/A
604	#N/A
605	#N/A
606	#N/A
607	#N/A
608	#N/A
610	#N/A
611	#N/A
613	#N/A
614	#N/A
615	#N/A
617	#N/A
618	#N/A
619	#N/A
620	#N/A
621	#N/A
622	#N/A
623	#N/A
624	#N/A
626	#N/A
628	#N/A
629	#N/A
630	#N/A
631	#N/A
632	#N/A
633	#N/A
634	#N/A
635	#N/A
636	#N/A
637	#N/A
638	#N/A
639	#N/A
640	#N/A
641	#N/A
642	#N/A
643	#N/A
644	#N/A
645	#N/A
646	#N/A
647	#N/A
648	#N/A
649	#N/A
650	#N/A
651	#N/A
652	#N/A
653	#N/A
654	#N/A
655	#N/A
656	#N/A
657	#N/A
658	#N/A
659	#N/A
660	#N/A
661	#N/A
662	#N/A
663	#N/A
664	#N/A
665	#N/A
666	#N/A
667	#N/A
668	#N/A
669	#N/A
670	#N/A
671	#N/A
672	#N/A
673	#N/A
674	#N/A
675	#N/A
676	#N/A
677	#N/A
678	#N/A
679	#N/A
680	#N/A
681	#N/A
682	#N/A
683	#N/A
684	#N/A
685	#N/A
686	#N/A
687	#N/A
688	#N/A
689	#N/A
690	#N/A
691	#N/A
692	#N/A
693	#N/A
694	#N/A
695	#N/A
696	#N/A
697	#N/A
698	#N/A
699	#N/A
700	#N/A
701	#N/A
702	#N/A
703	#N/A
704	#N/A
705	#N/A
706	#N/A
707	#N/A
708	#N/A
709	#N/A
710	#N/A
711	#N/A
712	#N/A
713	#N/A
714	#N/A
715	#N/A
716	#N/A
717	#N/A
718	#N/A
719	#N/A
720	#N/A
721	#N/A
722	#N/A
723	#N/A
724	#N/A
725	#N/A
726	#N/A
727	#N/A
728	#N/A
729	#N/A
730	#N/A
731	#N/A
732	#N/A
733	#N/A
734	#N/A
735	#N/A
736	#N/A
737	#N/A
738	#N/A
739	#N/A
740	#N/A
741	#N/A
742	#N/A
743	#N/A
744	#N/A
745	#N/A
746	#N/A
747	#N/A
748	#N/A
749	#N/A
750	#N/A
751	#N/A
752	#N/A
753	#N/A
754	#N/A
755	#N/A
756	#N/A
757	#N/A
758	#N/A
759	#N/A
760	#N/A
761	#N/A
762	#N/A
763	#N/A
764	#N/A
765	#N/A
766	#N/A
767	#N/A
768	#N/A
769	#N/A
770	#N/A
771	#N/A
772	#N/A
773	#N/A
774	#N/A
775	#N/A
776	#N/A
777	#N/A
778	#N/A
779	#N/A
780	#N/A
781	#N/A
782	#N/A
783	#N/A
784	#N/A
785	#N/A
786	#N/A
787	#N/A
788	#N/A
789	#N/A
790	#N/A
791	#N/A
792	#N/A
793	#N/A
794	#N/A
795	#N/A
796	#N/A
797	#N/A
798	#N/A
799	#N/A
800	#N/A
801	#N/A
802	#N/A
803	#N/A
804	#N/A
805	#N/A
806	#N/A
807	#N/A
808	#N/A
809	#N/A
810	#N/A
811	#N/A
812	#N/A
813	#N/A
814	#N/A
815	#N/A
816	#N/A
817	#N/A
818	#N/A
819	#N/A
820	#N/A
821	#N/A
822	#N/A
823	#N/A
824	#N/A
825	#N/A
826	#N/A
827	#N/A
828	#N/A
829	#N/A
830	#N/A
831	#N/A
832	#N/A
833	#N/A
834	#N/A
835	#N/A
836	#N/A
837	#N/A
838	#N/A
839	#N/A
840	#N/A
841	#N/A
842	#N/A
843	#N/A
844	#N/A
845	#N/A
846	#N/A
847	#N/A
848	#N/A
849	#N/A
850	#N/A
851	#N/A
852	#N/A
853	#N/A
854	#N/A
855	#N/A
856	#N/A
857	#N/A
858	#N/A
859	#N/A
860	#N/A
861	#N/A
862	#N/A
863	#N/A
864	#N/A
865	#N/A
866	#N/A
867	#N/A
868	#N/A
869	#N/A
870	#N/A
871	#N/A
872	#N/A
873	#N/A
874	#N/A
875	#N/A
876	#N/A
877	#N/A
878	#N/A
879	#N/A
880	#N/A
881	#N/A
882	#N/A
883	#N/A
884	#N/A
885	#N/A
886	#N/A
887	#N/A
888	#N/A
889	#N/A
890	#N/A
891	#N/A
892	#N/A
893	#N/A
894	#N/A
895	#N/A
896	#N/A
897	#N/A
898	#N/A
899	#N/A
900	#N/A
901	#N/A
902	#N/A
903	#N/A
904	#N/A
905	#N/A
906	#N/A
907	#N/A
908	#N/A
909	#N/A
910	#N/A
911	#N/A
912	#N/A
913	#N/A
914	#N/A
915	#N/A
916	#N/A
917	#N/A
918	#N/A
919	#N/A
920	#N/A
921	#N/A
922	#N/A
923	#N/A
924	#N/A
925	#N/A
926	#N/A
927	#N/A
928	#N/A
929	#N/A
930	#N/A
931	#N/A
932	#N/A
933	#N/A
934	#N/A
935	#N/A
936	#N/A
937	#N/A
938	#N/A
939	#N/A
940	#N/A
941	#N/A
942	#N/A
943	#N/A
944	#N/A
945	#N/A
946	#N/A
947	#N/A
948	#N/A
949	#N/A
950	#N/A
951	#N/A
952	#N/A
953	#N/A
954	#N/A
955	#N/A
956	#N/A
957	#N/A
958	#N/A
959	#N/A
960	#N/A
961	#N/A
962	#N/A
963	#N/A
964	#N/A
965	#N/A
966	#N/A
967	#N/A
968	#N/A
969	#N/A
970	#N/A
971	#N/A
972	#N/A
973	#N/A
974	#N/A
975	#N/A
976	#N/A
977	#N/A
978	#N/A
979	#N/A
980	#N/A
981	#N/A
982	#N/A
983	#N/A
984	#N/A
985	#N/A
986	#N/A
987	#N/A
988	#N/A
989	#N/A
990	#N/A
991	#N/A
992	#N/A
993	#N/A
994	#N/A
995	#N/A
996	#N/A
997	#N/A
998	#N/A

## Sheet: lung cancer
SNP	P Value	Cancer	Population and Source	PMID
rs4488809	1.61e-05	lung adenocarcinoma	Japanese and Korean	20871597
rs9816619	2.03e-05	lung adenocarcinoma	Japanese and Korean	20871597
rs10937405	0.0001	lung adenocarcinoma	Japanese and Korean	20871597
rs4600802	2.76e-05	lung adenocarcinoma	Japanese and Korean	20871597
rs7355025	0.318	lung adenocarcinoma	Japanese and Korean	20871597
rs743012	0.859	lung adenocarcinoma	Japanese and Korean	20871597
rs6428571	0.986	lung adenocarcinoma	Japanese and Korean	20871597
rs522870	0.156	lung adenocarcinoma	Japanese and Korean	20871597
rs11892454	0.772	lung adenocarcinoma	Japanese and Korean	20871597
rs2631941	0.172	lung adenocarcinoma	Japanese and Korean	20871597
rs10490658	0.6	lung adenocarcinoma	Japanese and Korean	20871597
rs1007823	0.868	lung adenocarcinoma	Japanese and Korean	20871597
rs2160411	0.912	lung adenocarcinoma	Japanese and Korean	20871597
rs13059346	0.879	lung adenocarcinoma	Japanese and Korean	20871597
rs6784559	0.696	lung adenocarcinoma	Japanese and Korean	20871597
rs6665	0.991	lung adenocarcinoma	Japanese and Korean	20871597
rs10937405	0.000271	lung adenocarcinoma	Japanese and Korean	20871597
rs6816078	0.649	lung adenocarcinoma	Japanese and Korean	20871597
rs2320771	0.842	lung adenocarcinoma	Japanese and Korean	20871597
rs2736100	0.00192	lung adenocarcinoma	Japanese and Korean	20871597
rs6866285	0.29	lung adenocarcinoma	Japanese and Korean	20871597
rs4836066	0.0332	lung adenocarcinoma	Japanese and Korean	20871597
rs2268718	0.273	lung adenocarcinoma	Japanese and Korean	20871597
rs210610	0.000721	lung adenocarcinoma	Japanese and Korean	20871597
rs9375355	0.967	lung adenocarcinoma	Japanese and Korean	20871597
rs391210	0.889	lung adenocarcinoma	Japanese and Korean	20871597
rs4734484	0.781	lung adenocarcinoma	Japanese and Korean	20871597
rs7004099	0.204	lung adenocarcinoma	Japanese and Korean	20871597
rs7816010	0.211	lung adenocarcinoma	Japanese and Korean	20871597
rs7038689	0.81	lung adenocarcinoma	Japanese and Korean	20871597
rs765958	0.791	lung adenocarcinoma	Japanese and Korean	20871597
rs1112922	0.342	lung adenocarcinoma	Japanese and Korean	20871597
rs9326475	0.433	lung adenocarcinoma	Japanese and Korean	20871597
rs2514133	0.00764	lung adenocarcinoma	Japanese and Korean	20871597
rs12422304	0.958	lung adenocarcinoma	Japanese and Korean	20871597
rs832504	0.912	lung adenocarcinoma	Japanese and Korean	20871597
rs224773	0.497	lung adenocarcinoma	Japanese and Korean	20871597
rs10847046	0.603	lung adenocarcinoma	Japanese and Korean	20871597
rs725834	0.847	lung adenocarcinoma	Japanese and Korean	20871597
rs9557341	0.424	lung adenocarcinoma	Japanese and Korean	20871597
rs766132	0.371	lung adenocarcinoma	Japanese and Korean	20871597
rs8040530	0.101	lung adenocarcinoma	Japanese and Korean	20871597
rs8025210	0.356	lung adenocarcinoma	Japanese and Korean	20871597
rs8053669	0.118	lung adenocarcinoma	Japanese and Korean	20871597
rs8061067	0.113	lung adenocarcinoma	Japanese and Korean	20871597
rs3786099	0.703	lung adenocarcinoma	Japanese and Korean	20871597
rs9945635	0.068	lung adenocarcinoma	Japanese and Korean	20871597
rs2729741	0.694	lung adenocarcinoma	Japanese and Korean	20871597
rs11663418	0.0241	lung adenocarcinoma	Japanese and Korean	20871597
rs6035877	0.376	lung adenocarcinoma	Japanese and Korean	20871597
rs852333	0.451	lung adenocarcinoma	Japanese and Korean	20871597
rs8136914	0.368	lung adenocarcinoma	Japanese and Korean	20871597
rs4823839	0.459	lung adenocarcinoma	Japanese and Korean	20871597
rs17589429	0.431	lung adenocarcinoma	Japanese and Korean	20871597
rs2808630	0.415	lung adenocarcinoma	Japanese and Korean	20871597
rs4254535	0.287	lung adenocarcinoma	Japanese and Korean	20871597
rs1530057	0.771	lung adenocarcinoma	Japanese and Korean	20871597
rs1201296	0.692	lung adenocarcinoma	Japanese and Korean	20871597
rs9840545	0.0242	lung adenocarcinoma	Japanese and Korean	20871597
rs7626795	0.349	lung adenocarcinoma	Japanese and Korean	20871597
rs10516367	0.658	lung adenocarcinoma	Japanese and Korean	20871597
rs2736100	5.2e-06	lung adenocarcinoma	Japanese and Korean	20871597
rs4635969	NA	lung adenocarcinoma	Japanese and Korean	20871597
rs402710	NA	lung adenocarcinoma	Japanese and Korean	20871597
rs401681	0.0106	lung adenocarcinoma	Japanese and Korean	20871597
rs31489	0.0922	lung adenocarcinoma	Japanese and Korean	20871597
rs1366625	0.927	lung adenocarcinoma	Japanese and Korean	20871597
rs9295740	0.397	lung adenocarcinoma	Japanese and Korean	20871597
rs13194504	NA	lung adenocarcinoma	Japanese and Korean	20871597
rs4324798	NA	lung adenocarcinoma	Japanese and Korean	20871597
rs3749971	0.0241	lung adenocarcinoma	Japanese and Korean	20871597
rs3117582	NA	lung adenocarcinoma	Japanese and Korean	20871597
rs3131379	NA	lung adenocarcinoma	Japanese and Korean	20871597
rs7910260	0.178	lung adenocarcinoma	Japanese and Korean	20871597
rs1926203	0.727	lung adenocarcinoma	Japanese and Korean	20871597
rs1955504	0.914	lung adenocarcinoma	Japanese and Korean	20871597
rs748404	0.998	lung adenocarcinoma	Japanese and Korean	20871597
rs8034191	0.339	lung adenocarcinoma	Japanese and Korean	20871597
rs2036534	0.807	lung adenocarcinoma	Japanese and Korean	20871597
rs667282	NA	lung adenocarcinoma	Japanese and Korean	20871597
rs12910984	0.717	lung adenocarcinoma	Japanese and Korean	20871597
rs1051730	0.289	lung adenocarcinoma	Japanese and Korean	20871597
rs938682	0.757	lung adenocarcinoma	Japanese and Korean	20871597
rs12914385	0.299	lung adenocarcinoma	Japanese and Korean	20871597
rs8042374	0.931	lung adenocarcinoma	Japanese and Korean	20871597
rs6495309	0.922	lung adenocarcinoma	Japanese and Korean	20871597
rs7259688	0.694	lung adenocarcinoma	Japanese and Korean	20871597
rs6080100	0.189	lung adenocarcinoma	Japanese and Korean	20871597
rs9831513	0.759	lung adenocarcinoma	Japanese and Korean	20871597
rs6806854	0.817	lung adenocarcinoma	Japanese and Korean	20871597
rs2552360	0.747	lung adenocarcinoma	Japanese and Korean	20871597
rs4404437	0.549	lung adenocarcinoma	Japanese and Korean	20871597
rs4611807	0.771	lung adenocarcinoma	Japanese and Korean	20871597
rs13322914	0.402	lung adenocarcinoma	Japanese and Korean	20871597
rs2600843	0.579	lung adenocarcinoma	Japanese and Korean	20871597
rs2046693	0.337	lung adenocarcinoma	Japanese and Korean	20871597
rs6767124	0.301	lung adenocarcinoma	Japanese and Korean	20871597
rs1364593	0.342	lung adenocarcinoma	Japanese and Korean	20871597
rs10513838	0.212	lung adenocarcinoma	Japanese and Korean	20871597
rs7621676	0.963	lung adenocarcinoma	Japanese and Korean	20871597
rs6444383	0.847	lung adenocarcinoma	Japanese and Korean	20871597
rs1895663	0.122	lung adenocarcinoma	Japanese and Korean	20871597
rs1597774	0.729	lung adenocarcinoma	Japanese and Korean	20871597
rs1597775	0.305	lung adenocarcinoma	Japanese and Korean	20871597
rs9812024	0.386	lung adenocarcinoma	Japanese and Korean	20871597
rs7617035	0.222	lung adenocarcinoma	Japanese and Korean	20871597
rs6444384	0.234	lung adenocarcinoma	Japanese and Korean	20871597
rs17429138	0.501	lung adenocarcinoma	Japanese and Korean	20871597
rs4687051	0.314	lung adenocarcinoma	Japanese and Korean	20871597
rs12496452	0.225	lung adenocarcinoma	Japanese and Korean	20871597
rs6776619	0.561	lung adenocarcinoma	Japanese and Korean	20871597
rs9862720	0.0462	lung adenocarcinoma	Japanese and Korean	20871597
rs949561	0.711	lung adenocarcinoma	Japanese and Korean	20871597
rs6444386	0.596	lung adenocarcinoma	Japanese and Korean	20871597
rs17429491	0.496	lung adenocarcinoma	Japanese and Korean	20871597
rs11926834	0.568	lung adenocarcinoma	Japanese and Korean	20871597
rs1424824	0.00262	lung adenocarcinoma	Japanese and Korean	20871597
rs16864552	0.979	lung adenocarcinoma	Japanese and Korean	20871597
rs16864553	0.269	lung adenocarcinoma	Japanese and Korean	20871597
rs9818996	0.00461	lung adenocarcinoma	Japanese and Korean	20871597
rs9849562	0.00278	lung adenocarcinoma	Japanese and Korean	20871597
rs9833664	0.00781	lung adenocarcinoma	Japanese and Korean	20871597
rs13071778	0.026	lung adenocarcinoma	Japanese and Korean	20871597
rs9825314	0.248	lung adenocarcinoma	Japanese and Korean	20871597
rs1317484	0.528	lung adenocarcinoma	Japanese and Korean	20871597
rs2141609	0.547	lung adenocarcinoma	Japanese and Korean	20871597
rs7615734	0.012	lung adenocarcinoma	Japanese and Korean	20871597
rs9846068	0.0756	lung adenocarcinoma	Japanese and Korean	20871597
rs3856776	0.0454	lung adenocarcinoma	Japanese and Korean	20871597
rs9290900	0.00418	lung adenocarcinoma	Japanese and Korean	20871597
rs17443378	0.0906	lung adenocarcinoma	Japanese and Korean	20871597
rs2378502	0.162	lung adenocarcinoma	Japanese and Korean	20871597
rs6787246	0.0219	lung adenocarcinoma	Japanese and Korean	20871597
rs12635565	0.551	lung adenocarcinoma	Japanese and Korean	20871597
rs12633764	0.0589	lung adenocarcinoma	Japanese and Korean	20871597
rs10937394	0.0114	lung adenocarcinoma	Japanese and Korean	20871597
rs7612053	0.0386	lung adenocarcinoma	Japanese and Korean	20871597
rs7646083	0.314	lung adenocarcinoma	Japanese and Korean	20871597
rs6792756	0.00977	lung adenocarcinoma	Japanese and Korean	20871597
rs9817078	0.403	lung adenocarcinoma	Japanese and Korean	20871597
rs9882796	0.00161	lung adenocarcinoma	Japanese and Korean	20871597
rs9812901	0.0263	lung adenocarcinoma	Japanese and Korean	20871597
rs1920286	0.108	lung adenocarcinoma	Japanese and Korean	20871597
rs7629431	0.559	lung adenocarcinoma	Japanese and Korean	20871597
rs13085076	0.021	lung adenocarcinoma	Japanese and Korean	20871597
rs10937396	0.0505	lung adenocarcinoma	Japanese and Korean	20871597
rs9332461	0.00199	lung adenocarcinoma	Japanese and Korean	20871597
rs4398410	0.00105	lung adenocarcinoma	Japanese and Korean	20871597
rs17444539	0.0466	lung adenocarcinoma	Japanese and Korean	20871597
rs6790258	0.00404	lung adenocarcinoma	Japanese and Korean	20871597
rs6790731	0.13	lung adenocarcinoma	Japanese and Korean	20871597
rs6797409	0.00632	lung adenocarcinoma	Japanese and Korean	20871597
rs28673064	0.582	lung adenocarcinoma	Japanese and Korean	20871597
rs6763020	0.946	lung adenocarcinoma	Japanese and Korean	20871597
rs4396880	0.000241	lung adenocarcinoma	Japanese and Korean	20871597
rs4488809	1.61e-05	lung adenocarcinoma	Japanese and Korean	20871597
rs1920266	0.826	lung adenocarcinoma	Japanese and Korean	20871597
rs1920265	0.0226	lung adenocarcinoma	Japanese and Korean	20871597
rs1881993	0.481	lung adenocarcinoma	Japanese and Korean	20871597
rs9847400	0.364	lung adenocarcinoma	Japanese and Korean	20871597
rs9873650	0.539	lung adenocarcinoma	Japanese and Korean	20871597
rs9834994	0.0331	lung adenocarcinoma	Japanese and Korean	20871597
rs10937401	0.474	lung adenocarcinoma	Japanese and Korean	20871597
rs9835487	0.000233	lung adenocarcinoma	Japanese and Korean	20871597
rs9835923	0.668	lung adenocarcinoma	Japanese and Korean	20871597
rs10155001	0.481	lung adenocarcinoma	Japanese and Korean	20871597
rs6774934	0.00065	lung adenocarcinoma	Japanese and Korean	20871597
rs9816619	2.18e-05	lung adenocarcinoma	Japanese and Korean	20871597
rs10937405	8.28e-05	lung adenocarcinoma	Japanese and Korean	20871597
rs4600802	2.59e-05	lung adenocarcinoma	Japanese and Korean	20871597
rs12631683	0.853	lung adenocarcinoma	Japanese and Korean	20871597
rs1920280	0.394	lung adenocarcinoma	Japanese and Korean	20871597
rs1920281	0.0299	lung adenocarcinoma	Japanese and Korean	20871597
rs1920282	0.915	lung adenocarcinoma	Japanese and Korean	20871597
rs6804873	0.41	lung adenocarcinoma	Japanese and Korean	20871597
rs7649341	0.147	lung adenocarcinoma	Japanese and Korean	20871597
rs13080141	0.0223	lung adenocarcinoma	Japanese and Korean	20871597
rs13097576	0.14	lung adenocarcinoma	Japanese and Korean	20871597
rs6801312	0.00437	lung adenocarcinoma	Japanese and Korean	20871597
rs9846059	0.465	lung adenocarcinoma	Japanese and Korean	20871597
rs12489218	0.558	lung adenocarcinoma	Japanese and Korean	20871597
rs4118375	0.108	lung adenocarcinoma	Japanese and Korean	20871597
rs7622471	0.554	lung adenocarcinoma	Japanese and Korean	20871597
rs16864723	0.559	lung adenocarcinoma	Japanese and Korean	20871597
rs16864725	0.208	lung adenocarcinoma	Japanese and Korean	20871597
rs17445954	0.0115	lung adenocarcinoma	Japanese and Korean	20871597
rs16864734	0.186	lung adenocarcinoma	Japanese and Korean	20871597
rs10513840	0.00943	lung adenocarcinoma	Japanese and Korean	20871597
rs4575879	0.0115	lung adenocarcinoma	Japanese and Korean	20871597
rs4450788	0.156	lung adenocarcinoma	Japanese and Korean	20871597
rs11707283	0.00741	lung adenocarcinoma	Japanese and Korean	20871597
rs9839197	0.0233	lung adenocarcinoma	Japanese and Korean	20871597
rs4687087	0.174	lung adenocarcinoma	Japanese and Korean	20871597
rs6804480	0.954	lung adenocarcinoma	Japanese and Korean	20871597
rs7616178	0.772	lung adenocarcinoma	Japanese and Korean	20871597
rs13095039	0.769	lung adenocarcinoma	Japanese and Korean	20871597
rs1051730	9.99803e-06		Texas-GWA	18978787
rs8034191	1.7783e-05		Texas-GWA	18978787
rs2036534	0.0109073		Texas-GWA	18978787
rs6495309	0.00438197		Texas-GWA	18978787
rs1394371	0.00123949		Texas-GWA	18978787
rs4887053	0.0529384		Texas-GWA	18978787
rs6495314	0.052091		Texas-GWA	18978787
rs3117582	0.709693		Texas-GWA	18978787
rs1996371	0.0556922		Texas-GWA	18978787
rs11638372	0.0777598		Texas-GWA	18978787
rs4887077	0.0729212		Texas-GWA	18978787
rs3131379	0.852342		Texas-GWA	18978787
rs9295740	0.0236578		Texas-GWA	18978787
rs558702	0.888313		Texas-GWA	18978787
rs12594247	0.0420541		Texas-GWA	18978787
rs9262143	0.384684		Texas-GWA	18978787
rs1270942	0.925213		Texas-GWA	18978787
rs2187668	0.564916		Texas-GWA	18978787
rs1481847	1.09881e-05		Texas-GWA	18978787
rs7750641	0.508395		Texas-GWA	18978787
rs389884	0.924952		Texas-GWA	18978787
rs401681	0.0250011		Texas-GWA	18978787
rs2256543	0.00280674		Texas-GWA	18978787
rs1235162	0.372568		Texas-GWA	18978787
rs8321	0.335588		Texas-GWA	18978787
rs4254535	0.0119448		Texas-GWA	18978787
rs1020312	0.000105548		Texas-GWA	18978787
rs7775397	0.601083		Texas-GWA	18978787
rs4324798	0.917926		Texas-GWA	18978787
rs4975616	0.104851		Texas-GWA	18978787
rs1926203	0.0101519		Texas-GWA	18978787
rs3130893	0.877556		Texas-GWA	18978787
rs3130380	0.319544		Texas-GWA	18978787
rs2837378	0.286282		Texas-GWA	18978787
rs2746150	0.879317		Texas-GWA	18978787
rs1481855	5.59861e-05		Texas-GWA	18978787
rs6904596	0.347966		Texas-GWA	18978787
rs3131093	0.877245		Texas-GWA	18978787
rs3129791	0.796925		Texas-GWA	18978787
rs422331	0.623404		Texas-GWA	18978787
rs9261290	0.387155		Texas-GWA	18978787
rs3099844	0.858237		Texas-GWA	18978787
rs3132610	0.50263		Texas-GWA	18978787
rs1447210	0.00276488		Texas-GWA	18978787
rs174570	0.00560604		Texas-GWA	18978787
rs31489	0.0428078		Texas-GWA	18978787
rs2734986	0.0266179		Texas-GWA	18978787
rs10946808	0.0598266		Texas-GWA	18978787
rs7998462	0.0101247		Texas-GWA	18978787
rs171388	0.0272593		Texas-GWA	18978787
rs3749971	0.724111		Texas-GWA	18978787
rs7814391	0.00372632		Texas-GWA	18978787
rs1233579	0.796413		Texas-GWA	18978787
rs1995917	0.00289274		Texas-GWA	18978787
rs13194504	0.678912		Texas-GWA	18978787
rs915108	0.0269672		Texas-GWA	18978787
rs4785310	0.0101929		Texas-GWA	18978787
rs504022	0.951314		Texas-GWA	18978787
rs3734523	0.198605		Texas-GWA	18978787
rs6934993	0.266717		Texas-GWA	18978787
rs9650084	0.0874538		Texas-GWA	18978787
rs1545092	0.397775		Texas-GWA	18978787
rs9515642	0.225703		Texas-GWA	18978787
rs259940	0.0641611		Texas-GWA	18978787
rs4245815	0.0373524		Texas-GWA	18978787
rs1794282	0.773712		Texas-GWA	18978787
rs4679232	0.0966546		Texas-GWA	18978787
rs826802	0.0411337		Texas-GWA	18978787
rs2524005	0.187816		Texas-GWA	18978787
rs11144603	0.249259		Texas-GWA	18978787
rs9829889	0.797689		Texas-GWA	18978787
rs11144641	1		Texas-GWA	18978787
rs1938648	0.402074		Texas-GWA	18978787
rs9470224	0.000355397		Texas-GWA	18978787
rs175597	0.234177		Texas-GWA	18978787
rs13211507	0.713825		Texas-GWA	18978787
rs1051385	0.047093		Texas-GWA	18978787
rs1051730	4.00374e-07		UK-GWA	18978787
rs8034191	1.35499e-06		UK-GWA	18978787
rs2036534	1.91851e-10		UK-GWA	18978787
rs6495309	1.79602e-10		UK-GWA	18978787
rs1394371	0.000130057		UK-GWA	18978787
rs4887053	8.37533e-08		UK-GWA	18978787
rs6495314	0.000142678		UK-GWA	18978787
rs3117582	6.24204e-06		UK-GWA	18978787
rs1996371	0.000141244		UK-GWA	18978787
rs11638372	5.29404e-05		UK-GWA	18978787
rs4887077	6.09583e-05		UK-GWA	18978787
rs3131379	0.000204707		UK-GWA	18978787
rs9295740	0.0260133		UK-GWA	18978787
rs558702	0.000215306		UK-GWA	18978787
rs12594247	0.00022248		UK-GWA	18978787
rs9262143	0.00158545		UK-GWA	18978787
rs1270942	0.000671624		UK-GWA	18978787
rs2187668	0.00364272		UK-GWA	18978787
rs1481847	0.0237338		UK-GWA	18978787
rs7750641	0.00160221		UK-GWA	18978787
rs389884	0.00128195		UK-GWA	18978787
rs401681	0.00558291		UK-GWA	18978787
rs2256543	0.00850992		UK-GWA	18978787
rs1235162	0.00868927		UK-GWA	18978787
rs8321	0.00421701		UK-GWA	18978787
rs4254535	0.00157996		UK-GWA	18978787
rs1020312	0.18388		UK-GWA	18978787
rs7775397	0.00113253		UK-GWA	18978787
rs4324798	0.020991		UK-GWA	18978787
rs4975616	0.00272402		UK-GWA	18978787
rs1926203	0.0591612		UK-GWA	18978787
rs3130893	0.0148086		UK-GWA	18978787
rs3130380	0.00242865		UK-GWA	18978787
rs2837378	0.000694047		UK-GWA	18978787
rs2746150	0.0179529		UK-GWA	18978787
rs1481855	0.247237		UK-GWA	18978787
rs6904596	0.0139483		UK-GWA	18978787
rs3131093	0.0209483		UK-GWA	18978787
rs3129791	0.0216786		UK-GWA	18978787
rs422331	0.0456364		UK-GWA	18978787
rs9261290	0.00677158		UK-GWA	18978787
rs3099844	0.00326065		UK-GWA	18978787
rs3132610	0.0152817		UK-GWA	18978787
rs1447210	0.246789		UK-GWA	18978787
rs174570	0.0103353		UK-GWA	18978787
rs31489	0.0235182		UK-GWA	18978787
rs2734986	0.0466375		UK-GWA	18978787
rs10946808	0.0966962		UK-GWA	18978787
rs7998462	0.00269549		UK-GWA	18978787
rs171388	0.0142151		UK-GWA	18978787
rs3749971	0.0246226		UK-GWA	18978787
rs7814391	0.269488		UK-GWA	18978787
rs1233579	0.0298128		UK-GWA	18978787
rs1995917	0.148374		UK-GWA	18978787
rs13194504	0.0545452		UK-GWA	18978787
rs915108	0.0600528		UK-GWA	18978787
rs4785310	0.00762754		UK-GWA	18978787
rs504022	1.11022e-16		UK-GWA	18978787
rs3734523	0.111487		UK-GWA	18978787
rs6934993	0.0829861		UK-GWA	18978787
rs9650084	0.000198057		UK-GWA	18978787
rs1545092	0.0292082		UK-GWA	18978787
rs9515642	0.0324546		UK-GWA	18978787
rs259940	0.00700774		UK-GWA	18978787
rs4245815	0.00309058		UK-GWA	18978787
rs1794282	0.0085809		UK-GWA	18978787
rs4679232	0.0200491		UK-GWA	18978787
rs826802	0.118692		UK-GWA	18978787
rs2524005	0.0297459		UK-GWA	18978787
rs11144603	0.0566596		UK-GWA	18978787
rs9829889	0.0305059		UK-GWA	18978787
rs11144641	0.00966017		UK-GWA	18978787
rs1938648	0.00338484		UK-GWA	18978787
rs9470224	0.165208		UK-GWA	18978787
rs175597	0.0858469		UK-GWA	18978787
rs13211507	0.110248		UK-GWA	18978787
rs1051385	0.582273		UK-GWA	18978787
rs8034191	1.72E−05		Texas discovery	18385676
rs1051730	2.85E−05		Texas discovery	18385676
rs2395471	0.002	Overall NCI Data		19836008
rs3117582	0.001	Overall NCI Data		19836008
rs4324798	0.057	Overall NCI Data		19836008
rs2395471	0.04	Adenocarcinoma NCI Data		19836008
rs3117582	0.5	Adenocarcinoma NCI Data		19836008
rs4324798	0.68	Adenocarcinoma NCI Data		19836008
rs2395471	0.25	Squamous Cell Carcinoma NCI Data		19836008
rs3117582	0.015	Squamous Cell Carcinoma NCI Data		19836008
rs4324798	0.064	Squamous Cell Carcinoma NCI Data		19836008
rs2395471	0.42	Small Cell Carcinoma NCI Data		19836008
rs3117582	0.9	Small Cell Carcinoma NCI Data		19836008
rs4324798	0.31	Small Cell Carcinoma NCI Data		19836008
rs2736100	0.001	Overall NCI Data		19836008
rs31489	0.00028	Overall NCI Data		19836008
rs4635969	9.8e-05	Overall NCI Data		19836008
rs12914385	5.24 E-27	Overall NCI Data		19836008
rs1051730	2.75 E-38	Overall NCI Data		19836008
rs2736100	3.02e-07	Adenocarcinoma NCI Data		19836008
rs31489	0.067	Adenocarcinoma NCI Data		19836008
rs4635969	5.49e-05	Adenocarcinoma NCI Data		19836008
rs12914385	3.93e-14	Adenocarcinoma NCI Data		19836008
rs1051730	3.32e-18	Adenocarcinoma NCI Data		19836008
rs2736100	0.84	Squamous Cell Carcinoma NCI Data		19836008
rs31489	8.51e-05	Squamous Cell Carcinoma NCI Data		19836008
rs4635969	0.031	Squamous Cell Carcinoma NCI Data		19836008
rs12914385	5.23e-12	Squamous Cell Carcinoma NCI Data		19836008
rs1051730	8.72e-13	Squamous Cell Carcinoma NCI Data		19836008
rs2736100	0.93	Small Cell Carcinoma NCI Data		19836008
rs31489	0.089	Small Cell Carcinoma NCI Data		19836008
rs4635969	0.055	Small Cell Carcinoma NCI Data		19836008
rs12914385	3.76e-08	Small Cell Carcinoma NCI Data		19836008
rs1051730	2.31e-09	Small Cell Carcinoma NCI Data		19836008
rs12914385	6.94e-08	lung cancer	lung cancer	zbh001
rs1051730	9.26e-07	lung cancer	lung cancer	zbh001
rs8034191	1.13e-05	lung cancer	lung cancer	zbh001
rs4488809	4.6E−07	lung cancer	GWAS-Han Chinese	21725308
rs465498	1.3 E−07	lung cancer	GWAS-Han Chinese	21725308
rs2736100	5.1 E−05	lung cancer	GWAS-Han Chinese	21725308
rs753955	1.4 E−06	lung cancer	GWAS-Han Chinese	21725308
rs17728461	8.7 E−09	lung cancer	GWAS-Han Chinese	21725308
rs36600	2.2 E−06	lung cancer	GWAS-Han Chinese	21725308
rs4927136	8.11e-07	lung cancer Nanjing and Beijing	GWAS-Han Chinese	21725308
rs1846594	2.71e-40	lung cancer Nanjing and Beijing	GWAS-Han Chinese	21725308
rs465498	9.56e-07	lung cancer Nanjing and Beijing	GWAS-Han Chinese	21725308
rs9343676	1.46e-07	lung cancer Nanjing and Beijing	GWAS-Han Chinese	21725308
rs2523545	1.96e-11	lung cancer Nanjing and Beijing	GWAS-Han Chinese	21725308
rs4713447	2.26e-07	lung cancer Nanjing and Beijing	GWAS-Han Chinese	21725308
rs753725	1.85e-08	lung cancer Nanjing and Beijing	GWAS-Han Chinese	21725308
rs2517646	6.89e-08	lung cancer Nanjing and Beijing	GWAS-Han Chinese	21725308
rs1419675	1.48e-11	lung cancer Nanjing and Beijing	GWAS-Han Chinese	21725308
rs1632879	1.1e-08	lung cancer Nanjing and Beijing	GWAS-Han Chinese	21725308
rs407238	2.48e-07	lung cancer Nanjing and Beijing	GWAS-Han Chinese	21725308
rs2498274	5.25e-07	lung cancer Nanjing and Beijing	GWAS-Han Chinese	21725308
rs2242154	7.36e-07	lung cancer Nanjing and Beijing	GWAS-Han Chinese	21725308
rs174549	1.56e-07	lung cancer Nanjing and Beijing	GWAS-Han Chinese	21725308
rs2956467	3.77e-17	lung cancer Nanjing and Beijing	GWAS-Han Chinese	21725308
rs753955	3.54e-07	lung cancer Nanjing and Beijing	GWAS-Han Chinese	21725308
rs17728461	4.32e-11	lung cancer Nanjing and Beijing	GWAS-Han Chinese	21725308
rs36600	1.6e-07	lung cancer Nanjing and Beijing	GWAS-Han Chinese	21725308
rs10937405	0.00106	lung cancer Nanjing and Beijing	GWAS-Han Chinese	21725308
rs4488809	2.61e-06	lung cancer Nanjing and Beijing	GWAS-Han Chinese	21725308
rs2736100	5.54e-05	lung cancer Nanjing and Beijing	GWAS-Han Chinese	21725308
rs4927136	0.000137	lung cancer Nanjing	GWAS-Han Chinese	21725308
rs1846594	1.05e-27	lung cancer Nanjing	GWAS-Han Chinese	21725308
rs465498	0.000219	lung cancer Nanjing	GWAS-Han Chinese	21725308
rs9343676	7.24e-06	lung cancer Nanjing	GWAS-Han Chinese	21725308
rs2523545	2.41e-06	lung cancer Nanjing	GWAS-Han Chinese	21725308
rs4713447	0.000796	lung cancer Nanjing	GWAS-Han Chinese	21725308
rs753725	0.000323	lung cancer Nanjing	GWAS-Han Chinese	21725308
rs2517646	0.00365	lung cancer Nanjing	GWAS-Han Chinese	21725308
rs1419675	1.07e-05	lung cancer Nanjing	GWAS-Han Chinese	21725308
rs1632879	3.65e-05	lung cancer Nanjing	GWAS-Han Chinese	21725308
rs407238	0.0055	lung cancer Nanjing	GWAS-Han Chinese	21725308
rs2498274	0.000709	lung cancer Nanjing	GWAS-Han Chinese	21725308
rs2242154	0.000306	lung cancer Nanjing	GWAS-Han Chinese	21725308
rs174549	0.000598	lung cancer Nanjing	GWAS-Han Chinese	21725308
rs2956467	0.000555	lung cancer Nanjing	GWAS-Han Chinese	21725308
rs753955	0.00145	lung cancer Nanjing	GWAS-Han Chinese	21725308
rs17728461	0.00108	lung cancer Nanjing	GWAS-Han Chinese	21725308
rs36600	0.00185	lung cancer Nanjing	GWAS-Han Chinese	21725308
rs10937405	0.013	lung cancer Nanjing	GWAS-Han Chinese	21725308
rs4488809	2.43e-05	lung cancer Nanjing	GWAS-Han Chinese	21725308
rs2736100	0.00564	lung cancer Nanjing	GWAS-Han Chinese	21725308
rs4927136	0.00168	lung cancer Beijing	GWAS-Han Chinese	21725308
rs1846594	2.38e-14	lung cancer Beijing	GWAS-Han Chinese	21725308
rs465498	0.00111	lung cancer Beijing	GWAS-Han Chinese	21725308
rs9343676	0.00535	lung cancer Beijing	GWAS-Han Chinese	21725308
rs2523545	1.18e-06	lung cancer Beijing	GWAS-Han Chinese	21725308
rs4713447	3.83e-05	lung cancer Beijing	GWAS-Han Chinese	21725308
rs753725	6.04e-06	lung cancer Beijing	GWAS-Han Chinese	21725308
rs2517646	5.51e-07	lung cancer Beijing	GWAS-Han Chinese	21725308
rs1419675	1.39e-07	lung cancer Beijing	GWAS-Han Chinese	21725308
rs1632879	5.52e-05	lung cancer Beijing	GWAS-Han Chinese	21725308
rs407238	1.52e-06	lung cancer Beijing	GWAS-Han Chinese	21725308
rs2498274	0.00016	lung cancer Beijing	GWAS-Han Chinese	21725308
rs2242154	0.000624	lung cancer Beijing	GWAS-Han Chinese	21725308
rs174549	3.54e-05	lung cancer Beijing	GWAS-Han Chinese	21725308
rs2956467	6.6e-19	lung cancer Beijing	GWAS-Han Chinese	21725308
rs753955	2.68e-05	lung cancer Beijing	GWAS-Han Chinese	21725308
rs17728461	1.86e-10	lung cancer Beijing	GWAS-Han Chinese	21725308
rs36600	1.4e-05	lung cancer Beijing	GWAS-Han Chinese	21725308
rs10937405	0.0303	lung cancer Beijing	GWAS-Han Chinese	21725308
rs4488809	0.0273	lung cancer Beijing	GWAS-Han Chinese	21725308
rs2736100	0.00252	lung cancer Beijing	GWAS-Han Chinese	21725308
rs1655902	4.59e-08		GWAS-Han Chinese	21725308
rs2257914	2.94e-07		GWAS-Han Chinese	21725308
rs2596571	4.7e-09		GWAS-Han Chinese	21725308
rs2596573	5.56e-09		GWAS-Han Chinese	21725308
rs7762933	4.88e-07		GWAS-Han Chinese	21725308
rs174534	7.68e-07		GWAS-Han Chinese	21725308
rs174548	1.66e-07		GWAS-Han Chinese	21725308
rs174570	8.14e-07		GWAS-Han Chinese	21725308
rs174577	2.1e-07		GWAS-Han Chinese	21725308
rs174583	2.2e-07		GWAS-Han Chinese	21725308
rs4246215	9.35e-07		GWAS-Han Chinese	21725308
rs2051764	2.82e-07		GWAS-Han Chinese	21725308
rs737909	3.5e-07		GWAS-Han Chinese	21725308
rs9614162	1.76e-10		GWAS-Han Chinese	21725308
rs4927136	41000000000		GWAS-Han Chinese	21725308
rs1846594	1.7e-37		GWAS-Han Chinese	21725308
rs10937405	0.00029		GWAS-Han Chinese	21725308
rs4488809	4.6e-07		GWAS-Han Chinese	21725308
rs465498	1.3e-07		GWAS-Han Chinese	21725308
rs2736100	5.1e-05		GWAS-Han Chinese	21725308
rs9343676	4.1e-08		GWAS-Han Chinese	21725308
rs2523545	1.7e-10		GWAS-Han Chinese	21725308
rs4713447	3.4e-06		GWAS-Han Chinese	21725308
rs753725	2.1e-07		GWAS-Han Chinese	21725308
rs2517646	3.9e-07		GWAS-Han Chinese	21725308
rs1419675	1.7e-10		GWAS-Han Chinese	21725308
rs1632879	3.6e-07		GWAS-Han Chinese	21725308
rs407238	9.8e-07		GWAS-Han Chinese	21725308
rs2498274	9.7e-07		GWAS-Han Chinese	21725308
rs2242154	7.3e-07		GWAS-Han Chinese	21725308
rs174549	1e-07		GWAS-Han Chinese	21725308
rs2956467	2.9e-15		GWAS-Han Chinese	21725308
rs753955	1.4e-06		GWAS-Han Chinese	21725308
rs17728461	8.7e-09		GWAS-Han Chinese	21725308
rs36600	2.2e-06		GWAS-Han Chinese	21725308
rs4488809	2.6e-06		GWAS-Han Chinese	21725308
rs7636839	2.6e-06		GWAS-Han Chinese	21725308
rs2736100	5.5e-05		GWAS-Han Chinese	21725308
rs4975615	1.5e-05		GWAS-Han Chinese	21725308
rs4975616	1.3e-05		GWAS-Han Chinese	21725308
rs451360	6.6e-05		GWAS-Han Chinese	21725308
rs466502	2.5e-06		GWAS-Han Chinese	21725308
rs465498	3.2e-06		GWAS-Han Chinese	21725308
rs452932	2.2e-06		GWAS-Han Chinese	21725308
rs452384	5.7e-06		GWAS-Han Chinese	21725308
rs467095	6.3e-06		GWAS-Han Chinese	21725308
rs31484	3.8e-05		GWAS-Han Chinese	21725308
rs31489	5.3e-05		GWAS-Han Chinese	21725308
rs27070	6e-05		GWAS-Han Chinese	21725308
rs2861539	5.7e-05		GWAS-Han Chinese	21725308
rs12867512	5.2e-05		GWAS-Han Chinese	21725308
rs11617518	4.6e-05		GWAS-Han Chinese	21725308
rs9580741	4e-05		GWAS-Han Chinese	21725308
rs745068	4e-05		GWAS-Han Chinese	21725308
rs745069	1.9e-05		GWAS-Han Chinese	21725308
rs2840252	8.1e-05		GWAS-Han Chinese	21725308
rs9553037	2.6e-05		GWAS-Han Chinese	21725308
rs753955	2e-05		GWAS-Han Chinese	21725308
rs753954	3e-05		GWAS-Han Chinese	21725308
rs2349225	3.4e-06		GWAS-Han Chinese	21725308
rs36578	7.3e-06		GWAS-Han Chinese	21725308
rs1076137	3.4e-05		GWAS-Han Chinese	21725308
rs3958025	3.3e-05		GWAS-Han Chinese	21725308
rs5752968	3.3e-05		GWAS-Han Chinese	21725308
rs4993442	1.5e-06		GWAS-Han Chinese	21725308
rs9625874	1e-06		GWAS-Han Chinese	21725308
rs3887275	2.4e-07		GWAS-Han Chinese	21725308
rs8136147	2.4e-07		GWAS-Han Chinese	21725308
rs4823063	9.2e-07		GWAS-Han Chinese	21725308
rs36590	2.1e-07		GWAS-Han Chinese	21725308
rs36594	2.1e-07		GWAS-Han Chinese	21725308
rs36604	9.2e-07		GWAS-Han Chinese	21725308
rs36605	2.2e-07		GWAS-Han Chinese	21725308
rs36606	9.6e-07		GWAS-Han Chinese	21725308
rs36609	2.2e-07		GWAS-Han Chinese	21725308
rs737904	1.1e-06		GWAS-Han Chinese	21725308
rs5763634	1.1e-06		GWAS-Han Chinese	21725308
rs5763640	1.1e-06		GWAS-Han Chinese	21725308
rs5763644	1.1e-06		GWAS-Han Chinese	21725308
rs2051764	2.5e-07		GWAS-Han Chinese	21725308
rs4239932	8.3e-07		GWAS-Han Chinese	21725308
rs2017677	2.1e-07		GWAS-Han Chinese	21725308
rs737909	2.1e-07		GWAS-Han Chinese	21725308
rs3788423	1.5e-07		GWAS-Han Chinese	21725308
rs2412963	1.5e-07		GWAS-Han Chinese	21725308
rs41172	1.5e-09		GWAS-Han Chinese	21725308
rs28257	6.5e-08		GWAS-Han Chinese	21725308
rs41175	1.4e-09		GWAS-Han Chinese	21725308
rs41178	1.4e-09		GWAS-Han Chinese	21725308
rs41179	1.4e-09		GWAS-Han Chinese	21725308
rs193473	3.7e-08		GWAS-Han Chinese	21725308
rs8141404	4.7e-08		GWAS-Han Chinese	21725308
rs7510705	3e-09		GWAS-Han Chinese	21725308
rs9625919	4.7e-08		GWAS-Han Chinese	21725308
rs6006356	4.7e-05		GWAS-Han Chinese	21725308
rs718772	9.8e-08		GWAS-Han Chinese	21725308
rs4337577	4.9e-09		GWAS-Han Chinese	21725308
rs4239933	7.5e-08		GWAS-Han Chinese	21725308
rs11090598	1e-07		GWAS-Han Chinese	21725308
rs8139832	9.2e-05		GWAS-Han Chinese	21725308
rs36600	2.51e-07		GWAS-Han Chinese	21725308
rs9620953	1.3e-07		GWAS-Han Chinese	21725308
rs9625933	2.3e-08		GWAS-Han Chinese	21725308
rs8141765	1.9e-08		GWAS-Han Chinese	21725308
rs8138286	1.9e-08		GWAS-Han Chinese	21725308
rs1978083	2e-09		GWAS-Han Chinese	21725308
rs12167333	3e-09		GWAS-Han Chinese	21725308
rs713875	9.7e-06		GWAS-Han Chinese	21725308
rs9614157	5.9e-11		GWAS-Han Chinese	21725308
rs9614158	3.2e-10		GWAS-Han Chinese	21725308
rs17728461	5.9e-11		GWAS-Han Chinese	21725308
rs2023683	3.2e-10		GWAS-Han Chinese	21725308
rs9614159	2e-10		GWAS-Han Chinese	21725308
rs9614162	9.6e-11		GWAS-Han Chinese	21725308
rs753955	1.4e-06		GWAS-Han Chinese Northern and Southern	21725308
rs17728461	8.7e-09		GWAS-Han Chinese Northern and Southern	21725308
rs36600	2.2e-06		GWAS-Han Chinese Northern and Southern	21725308
rs753955	0.0003		GWAS-Han Chinese Southern	21725308
rs17728461	0.0007		GWAS-Han Chinese Southern	21725308
rs36600	0.00025		GWAS-Han Chinese Southern	21725308
rs753955	0.00062		GWAS-Han Chinese Northern	21725308
rs17728461	0.067		GWAS-Han Chinese Northern	21725308
rs36600	0.00031		GWAS-Han Chinese Northern	21725308
rs7626795	0.58		GWAS-Han Chinese	21725308
rs401681	0.27		GWAS-Han Chinese	21725308
rs938682	0.58		GWAS-Han Chinese	21725308
rs6080100	0.59		GWAS-Han Chinese	21725308
rs6901126	0.000127	lung cacer	Initial screen	19351763
rs4083914	0.000131	lung cacer	Initial screen	19351763
rs9479510	0.000243	lung cacer	Initial screen	19351763
rs6901126	0.005	lung cacer	GELCC	19351763
rs4083914	0.021	lung cacer	GELCC	19351763
rs9479510	0.031	lung cacer	GELCC	19351763
rs6901126	0.322	lung cacer	Mayo Clinic	19351763
rs4083914	0.033	lung cacer	Mayo Clinic	19351763
rs9479510	0.035	lung cacer	Mayo Clinic	19351763
rs2131877	2e-08	GWAS of non-small cell lung cancer	GWAS of non-small cell lung cancer	HGVST624
rs16951095	7e-06	GWAS of non-small cell lung cancer	GWAS of non-small cell lung cancer	HGVST624
rs9303196	8e-06	GWAS of non-small cell lung cancer	GWAS of non-small cell lung cancer	HGVST624
rs1656402	8e-08	GWAS of non-small cell lung cancer	GWAS of non-small cell lung cancer	HGVST673
rs1209950	3e-07	GWAS of non-small cell lung cancer	GWAS of non-small cell lung cancer	HGVST673
rs9981861	4e-06	GWAS of non-small cell lung cancer	GWAS of non-small cell lung cancer	HGVST673
rs10937405	7e-12	GWAS of lung adenocarcinoma	GWAS of lung adenocarcinoma	HGVST620
rs2736100	3e-11	GWAS of lung adenocarcinoma	GWAS of lung adenocarcinoma	HGVST620
rs2736100	2e-22	GWAS of lung adenocarcinoma	GWAS of lung adenocarcinoma	HGVST592
rs1051730	2e-51	GWAS of lung adenocarcinoma	GWAS of lung adenocarcinoma	HGVST357
rs3117582	5e-12	GWAS of lung adenocarcinoma	GWAS of lung adenocarcinoma	HGVST357
rs31489	2e-10	GWAS of lung adenocarcinoma	GWAS of lung adenocarcinoma	HGVST357
rs2736100	2e-10	GWAS of lung adenocarcinoma	GWAS of lung adenocarcinoma	HGVST357
rs4324798	2e-08	GWAS of lung adenocarcinoma	GWAS of lung adenocarcinoma	HGVST357
rs716274	9e-08	GWAS of small cell lung cancer	GWAS of small cell lung cancer	HGVST674
rs3750861	0.007	GWAS of lung cancer	GWAS of lung cancer	HGSVT72
rs8034191	3e-18	GWAS of lung cancer	GWAS of lung cancer	HGSVT119
rs2808630	7e-06	GWAS of lung cancer	GWAS of lung cancer	HGSVT119
rs7626795	8e-06	GWAS of lung cancer	GWAS of lung cancer	HGSVT119
rs8034191	1e-08	GWAS of lung cancer	GWAS of lung cancer	HGSVT136
rs8042374	8e-12	GWAS of lung cancer	GWAS of lung cancer	HGSVT170
rs3117582	5e-10	GWAS of lung cancer	GWAS of lung cancer	HGSVT170
rs401681	8e-09	GWAS of lung cancer	GWAS of lung cancer	HGSVT170
rs8034191	3e-26	GWAS of lung cancer	GWAS of lung cancer	HGSVT329
rs3117582	4e-10	GWAS of lung cancer	GWAS of lung cancer	HGSVT329
rs4975616	3e-09	GWAS of lung cancer	GWAS of lung cancer	HGSVT329
rs748404	1e-06	GWAS of lung cancer	GWAS of lung cancer	HGSVT329
rs1926203	1e-06	GWAS of lung cancer	GWAS of lung cancer	HGSVT329
rs1530057	3e-06	GWAS of lung cancer	GWAS of lung cancer	HGSVT329
rs4254535	5e-06	GWAS of lung cancer	GWAS of lung cancer	HGSVT329
rs2352028	6e-06	GWAS of lung cancer in never smokers	GWAS of lung cancer in never smokers	HGSVT479
rs1862214	0.0004	GWAS of lung cancer in smokers	GWAS of lung cancer in smokers	HGSVT74
rs1051730	1e-15	GWAS of lung cancer	GWAS of lung cancer	HGSVT164
rs402710	4e-06	GWAS of lung cancer	GWAS of lung cancer	HGSVT164
rs8034191	5e-20	GWAS of lung cancer	GWAS of lung cancer	HGSVT180

## Sheet: COPD
SNP	P1 value	Source1	Trait or Populationg	PMID
rs1903003	9.06x10-3	ECLIPSE	COPD and white ethnicity	20173748
rs7671167	7.75 x10-3	ECLIPSE	COPD and white ethnicity	20173748
rs2869967	4.43 x10-3	ECLIPSE	COPD and white ethnicity	20173748
rs1903003	1.36 x10-3	NETT-NAS	COPD and white ethnicity	20173748
rs7671167	2.69 x10-4	NETT-NAS	COPD and white ethnicity	20173748
rs2869967	7.60 x10-3	NETT-NAS	COPD and white ethnicity	20173748
rs1062980	4.81x10-7	Primary	COPD and white ethnicity	20173748
rs13180	5.01x10-7	Primary	COPD and white ethnicity	20173748
rs8034191	5.37x10-7	Primary	COPD and white ethnicity	20173748
rs1051730	2.80x10-6	Primary	COPD and white ethnicity	20173748
rs1828591	8.38x10-7	Primary	COPD and white ethnicity	20173748
rs13118928	9.24x10-7	Primary	COPD and white ethnicity	20173748
rs720485	9.87x10-7	Primary	COPD and white ethnicity	20173748
rs1062980	NA	COPD Gene	COPD and white ethnicity	20173748
rs13180	0.012	COPD Gene	COPD and white ethnicity	20173748
rs8034191	0.045	COPD Gene	COPD and white ethnicity	20173748
rs1051730	0.046	COPD Gene	COPD and white ethnicity	20173748
rs1828591	0.184	COPD Gene	COPD and white ethnicity	20173748
rs13118928	0.14	COPD Gene	COPD and white ethnicity	20173748
rs720485	NA	COPD Gene	COPD and white ethnicity	20173748
rs1062980	0.036	ECLIPSE	COPD and white ethnicity	20173748
rs13180	0.043	ECLIPSE	COPD and white ethnicity	20173748
rs8034191	0.82	ECLIPSE	COPD and white ethnicity	20173748
rs1051730	0.84	ECLIPSE	COPD and white ethnicity	20173748
rs1828591	8.33x10-3	ECLIPSE	COPD and white ethnicity	20173748
rs13118928	0.0111	ECLIPSE	COPD and white ethnicity	20173748
rs720485	0.01	ECLIPSE	COPD and white ethnicity	20173748
rs1062980	0.01	NETT-NAS	COPD and white ethnicity	20173748
rs13180	0.016	NETT-NAS	COPD and white ethnicity	20173748
rs8034191	8.69x10-3	NETT-NAS	COPD and white ethnicity	20173748
rs1051730	0.021	NETT-NAS	COPD and white ethnicity	20173748
rs1828591	6.70x10-5	NETT-NAS	COPD and white ethnicity	20173748
rs13118928	6.94x10-5	NETT-NAS	COPD and white ethnicity	20173748
rs720485	6.05x10-5	NETT-NAS	COPD and white ethnicity	20173748
rs1062980	9.95x10-3	Norway	COPD and white ethnicity	20173748
rs13180	7.90x10-3	Norway	COPD and white ethnicity	20173748
rs8034191	1.51x10-4	Norway	COPD and white ethnicity	20173748
rs1051730	4.32x10-4	Norway	COPD and white ethnicity	20173748
rs1828591	2.44x10-3	Norway	COPD and white ethnicity	20173748
rs13118928	2.32x10-3	Norway	COPD and white ethnicity	20173748
rs720485	2.46x10-3	Norway	COPD and white ethnicity	20173748
rs8034191	0.0001	Bergen Population	COPD GWAS	19300482
rs1051730	0.0002	Bergen Population	COPD GWAS	19300482
rs9686327	9.8x10-8	Bergen Population	COPD GWAS	19300482
rs735243	2.02x10-7	Bergen Population	COPD GWAS	19300482
rs11219732	4.47x10-6	Bergen Population	COPD GWAS	19300482
rs6720264	6.69x10-5	Bergen Population	COPD GWAS	19300482
rs1828591	0.00016	Bergen Population	COPD GWAS	19300482
rs13118928	0.00016	Bergen Population	COPD GWAS	19300482
rs8034191	2.21x10-5	ICGN Populaion	COPD GWAS	19300482
rs1051730	6.61x10-6	ICGN Populaion	COPD GWAS	19300482
rs9686327	0.0327	ICGN Populaion	COPD GWAS	19300482
rs735243	0.0334	ICGN Populaion	COPD GWAS	19300482
rs11219732	0.0131	ICGN Populaion	COPD GWAS	19300482
rs6720264	0.0148	ICGN Populaion	COPD GWAS	19300482
rs1828591	0.0245	ICGN Populaion	COPD GWAS	19300482
rs13118928	0.0297	ICGN Populaion	COPD GWAS	19300482
rs8034191	0.0025	NETT/NAS	COPD GWAS	19300482
rs1051730	0.017	NETT/NAS	COPD GWAS	19300482
rs9686327	0.048	NETT/NAS	COPD GWAS	19300482
rs735243	0.0348	NETT/NAS	COPD GWAS	19300482
rs11219732	NA	NETT/NAS	COPD GWAS	19300482
rs6720264	0.82	NETT/NAS	COPD GWAS	19300482
rs1828591	0.0019	NETT/NAS	COPD GWAS	19300482
rs13118928	0.0018	NETT/NAS	COPD GWAS	19300482
rs7727670	8.38e-08	Bergen Population	COPD GWAS	19300482
rs9686327	9.84e-08	Bergen Population	COPD GWAS	19300482
rs7341022	9.97e-08	Bergen Population	COPD GWAS	19300482
rs735243	2.02e-07	Bergen Population	COPD GWAS	19300482
rs1080879	7.69e-07	Bergen Population	COPD GWAS	19300482
rs32466	8.31e-07	Bergen Population	COPD GWAS	19300482
rs30539	3.38e-06	Bergen Population	COPD GWAS	19300482
rs11219732	4.47e-06	Bergen Population	COPD GWAS	19300482
rs7524799	6.74e-06	Bergen Population	COPD GWAS	19300482
rs11588172	9.02e-06	Bergen Population	COPD GWAS	19300482
rs7522756	1.44e-05	Bergen Population	COPD GWAS	19300482
rs1575208	1.46e-05	Bergen Population	COPD GWAS	19300482
rs9862661	1.57e-05	Bergen Population	COPD GWAS	19300482
rs6426962	1.94e-05	Bergen Population	COPD GWAS	19300482
rs12193019	2.27e-05	Bergen Population	COPD GWAS	19300482
rs16903825	2.35e-05	Bergen Population	COPD GWAS	19300482
rs1551133	2.38e-05	Bergen Population	COPD GWAS	19300482
rs13061634	2.76e-05	Bergen Population	COPD GWAS	19300482
rs12495172	2.79e-05	Bergen Population	COPD GWAS	19300482
rs239349	3.09e-05	Bergen Population	COPD GWAS	19300482
rs10942957	3.15e-05	Bergen Population	COPD GWAS	19300482
rs215864	3.3e-05	Bergen Population	COPD GWAS	19300482
rs12421122	3.52e-05	Bergen Population	COPD GWAS	19300482
rs6823107	3.62e-05	Bergen Population	COPD GWAS	19300482
rs4432437	4.22e-05	Bergen Population	COPD GWAS	19300482
rs11210569	4.4e-05	Bergen Population	COPD GWAS	19300482
rs2589183	4.5e-05	Bergen Population	COPD GWAS	19300482
rs12762979	4.59e-05	Bergen Population	COPD GWAS	19300482
rs1996020	4.86e-05	Bergen Population	COPD GWAS	19300482
rs732285	4.86e-05	Bergen Population	COPD GWAS	19300482
rs4754595	4.9e-05	Bergen Population	COPD GWAS	19300482
rs7775523	5.12e-05	Bergen Population	COPD GWAS	19300482
rs1738899	6.09e-05	Bergen Population	COPD GWAS	19300482
rs7529406	6.13e-05	Bergen Population	COPD GWAS	19300482
rs25796	6.43e-05	Bergen Population	COPD GWAS	19300482
rs32447	6.46e-05	Bergen Population	COPD GWAS	19300482
rs17310770	6.65e-05	Bergen Population	COPD GWAS	19300482
rs6852830	6.66e-05	Bergen Population	COPD GWAS	19300482
rs6720264	6.69e-05	Bergen Population	COPD GWAS	19300482
rs1622472	6.71e-05	Bergen Population	COPD GWAS	19300482
rs17099345	6.93e-05	Bergen Population	COPD GWAS	19300482
rs11719713	7.22e-05	Bergen Population	COPD GWAS	19300482
rs935381	7.47e-05	Bergen Population	COPD GWAS	19300482
rs2269640	7.54e-05	Bergen Population	COPD GWAS	19300482
rs12576370	7.59e-05	Bergen Population	COPD GWAS	19300482
rs4588237	7.66e-05	Bergen Population	COPD GWAS	19300482
rs16943236	7.68e-05	Bergen Population	COPD GWAS	19300482
rs7233241	7.76e-05	Bergen Population	COPD GWAS	19300482
rs26566	7.81e-05	Bergen Population	COPD GWAS	19300482
rs200303	7.96e-05	Bergen Population	COPD GWAS	19300482
rs12577504	8.16e-05	Bergen Population	COPD GWAS	19300482
rs10769813	8.54e-05	Bergen Population	COPD GWAS	19300482
rs4712564	8.79e-05	Bergen Population	COPD GWAS	19300482
rs9350301	8.93e-05	Bergen Population	COPD GWAS	19300482
rs4148777	9.07e-05	Bergen Population	COPD GWAS	19300482
rs3767943	9.18e-05	Bergen Population	COPD GWAS	19300482
rs8009673	9.54e-05	Bergen Population	COPD GWAS	19300482
rs4974153	9.55e-05	Bergen Population	COPD GWAS	19300482
rs10926189	9.95e-05	Bergen Population	COPD GWAS	19300482
rs979455	0.0001	Bergen Population	COPD GWAS	19300482
rs9639549	0.0001	Bergen Population	COPD GWAS	19300482
rs3747581	0.0001	Bergen Population	COPD GWAS	19300482
rs8034191	0.0001	Bergen Population	COPD GWAS	19300482
rs4458268	0.0001	Bergen Population	COPD GWAS	19300482
rs17090892	0.0001	Bergen Population	COPD GWAS	19300482
rs11177790	0.0001	Bergen Population	COPD GWAS	19300482
rs12339991	0.00011	Bergen Population	COPD GWAS	19300482
rs27536	0.00011	Bergen Population	COPD GWAS	19300482
rs2488825	0.00011	Bergen Population	COPD GWAS	19300482
rs9426841	0.00011	Bergen Population	COPD GWAS	19300482
rs3787025	0.00012	Bergen Population	COPD GWAS	19300482
rs875649	0.00012	Bergen Population	COPD GWAS	19300482
rs12537593	0.00012	Bergen Population	COPD GWAS	19300482
rs12097924	0.00013	Bergen Population	COPD GWAS	19300482
rs766908	0.00013	Bergen Population	COPD GWAS	19300482
rs1530169	0.00013	Bergen Population	COPD GWAS	19300482
rs10250721	0.00013	Bergen Population	COPD GWAS	19300482
rs3819783	0.00014	Bergen Population	COPD GWAS	19300482
rs4938648	0.00014	Bergen Population	COPD GWAS	19300482
rs40394	0.00014	Bergen Population	COPD GWAS	19300482
rs1807333	0.00014	Bergen Population	COPD GWAS	19300482
rs6540985	0.00014	Bergen Population	COPD GWAS	19300482
rs1548446	0.00014	Bergen Population	COPD GWAS	19300482
rs6789670	0.00014	Bergen Population	COPD GWAS	19300482
rs11709483	0.00014	Bergen Population	COPD GWAS	19300482
rs4712572	0.00014	Bergen Population	COPD GWAS	19300482
rs973852	0.00014	Bergen Population	COPD GWAS	19300482
rs9368262	0.00014	Bergen Population	COPD GWAS	19300482
rs8075200	0.00015	Bergen Population	COPD GWAS	19300482
rs4653305	0.00015	Bergen Population	COPD GWAS	19300482
rs1240265	0.00015	Bergen Population	COPD GWAS	19300482
rs1051730	0.00015	Bergen Population	COPD GWAS	19300482
rs13118928	0.00015	Bergen Population	COPD GWAS	19300482
rs1828591	0.00016	Bergen Population	COPD GWAS	19300482
rs12535529	0.00016	Bergen Population	COPD GWAS	19300482
rs4689860	0.00016	Bergen Population	COPD GWAS	19300482
rs12152753	0.00016	Bergen Population	COPD GWAS	19300482
rs3734046	0.00016	Bergen Population	COPD GWAS	19300482
rs12934964	0.00016	Bergen Population	COPD GWAS	19300482
rs8075175	0.00016	Bergen Population	COPD GWAS	19300482
rs11719713	7.22e-05	Bergen Population	COPD GWAS	19300482
rs935381	7.47e-05	Bergen Population	COPD GWAS	19300482
rs2269640	7.54e-05	Bergen Population	COPD GWAS	19300482
rs12576370	7.59e-05	Bergen Population	COPD GWAS	19300482
rs4588237	7.66e-05	Bergen Population	COPD GWAS	19300482
rs16943236	7.68e-05	Bergen Population	COPD GWAS	19300482
rs7233241	7.76e-05	Bergen Population	COPD GWAS	19300482
rs26566	7.81e-05	Bergen Population	COPD GWAS	19300482
rs200303	7.96e-05	Bergen Population	COPD GWAS	19300482
rs12577504	8.16e-05	Bergen Population	COPD GWAS	19300482
rs10769813	8.54e-05	Bergen Population	COPD GWAS	19300482
rs4712564	8.79e-05	Bergen Population	COPD GWAS	19300482
rs9350301	8.93e-05	Bergen Population	COPD GWAS	19300482
rs4148777	9.07e-05	Bergen Population	COPD GWAS	19300482
rs3767943	9.18e-05	Bergen Population	COPD GWAS	19300482
rs8009673	9.54e-05	Bergen Population	COPD GWAS	19300482
rs4974153	9.55e-05	Bergen Population	COPD GWAS	19300482
rs10926189	9.95e-05	Bergen Population	COPD GWAS	19300482
rs979455	0.0001	Bergen Population	COPD GWAS	19300482
rs9639549	0.0001	Bergen Population	COPD GWAS	19300482
rs3747581	0.0001	Bergen Population	COPD GWAS	19300482
rs8034191	0.0001	Bergen Population	COPD GWAS	19300482
rs4458268	0.0001	Bergen Population	COPD GWAS	19300482
rs17090892	0.0001	Bergen Population	COPD GWAS	19300482
rs11177790	0.0001	Bergen Population	COPD GWAS	19300482
rs12339991	0.00011	Bergen Population	COPD GWAS	19300482
rs27536	0.00011	Bergen Population	COPD GWAS	19300482
rs2488825	0.00011	Bergen Population	COPD GWAS	19300482
rs9426841	0.00011	Bergen Population	COPD GWAS	19300482
rs3787025	0.00012	Bergen Population	COPD GWAS	19300482
rs875649	0.00012	Bergen Population	COPD GWAS	19300482
rs12537593	0.00012	Bergen Population	COPD GWAS	19300482
rs12097924	0.00013	Bergen Population	COPD GWAS	19300482
rs766908	0.00013	Bergen Population	COPD GWAS	19300482
rs1530169	0.00013	Bergen Population	COPD GWAS	19300482
rs10250721	0.00013	Bergen Population	COPD GWAS	19300482
rs3819783	0.00014	Bergen Population	COPD GWAS	19300482
rs4938648	0.00014	Bergen Population	COPD GWAS	19300482
rs40394	0.00014	Bergen Population	COPD GWAS	19300482
rs1807333	0.00014	Bergen Population	COPD GWAS	19300482
rs6540985	0.00014	Bergen Population	COPD GWAS	19300482
rs1548446	0.00014	Bergen Population	COPD GWAS	19300482
rs6789670	0.00014	Bergen Population	COPD GWAS	19300482
rs11709483	0.00014	Bergen Population	COPD GWAS	19300482
rs4712572	0.00014	Bergen Population	COPD GWAS	19300482
rs973852	0.00014	Bergen Population	COPD GWAS	19300482
rs9368262	0.00014	Bergen Population	COPD GWAS	19300482
rs8075200	0.00015	Bergen Population	COPD GWAS	19300482
rs4653305	0.00015	Bergen Population	COPD GWAS	19300482
rs1240265	0.00015	Bergen Population	COPD GWAS	19300482
rs1051730	0.00015	Bergen Population	COPD GWAS	19300482
rs13118928	0.00015	Bergen Population	COPD GWAS	19300482
rs1828591	0.00016	Bergen Population	COPD GWAS	19300482
rs12535529	0.00016	Bergen Population	COPD GWAS	19300482
rs4689860	0.00016	Bergen Population	COPD GWAS	19300482
rs12152753	0.00016	Bergen Population	COPD GWAS	19300482
rs3734046	0.00016	Bergen Population	COPD GWAS	19300482
rs12934964	0.00016	Bergen Population	COPD GWAS	19300482
rs8075175	0.00016	Bergen Population	COPD GWAS	19300482
rs2568498	0.008559	Bergen Population	COPD GWAS	19300482
rs1394371	0.0009898	Bergen Population	COPD GWAS	19300482
rs12903150	0.06052	Bergen Population	COPD GWAS	19300482
rs17483548	0.0001397	Bergen Population	COPD GWAS	19300482
rs10519198	0.02045	Bergen Population	COPD GWAS	19300482
rs1964678	0.06051	Bergen Population	COPD GWAS	19300482
rs3817092	0.1838	Bergen Population	COPD GWAS	19300482
rs4299116	0.03428	Bergen Population	COPD GWAS	19300482
rs11634990	0.2761	Bergen Population	COPD GWAS	19300482
rs13180	0.03048	Bergen Population	COPD GWAS	19300482
rs8034191	0.0001584	Bergen Population	COPD GWAS	19300482
rs10519203	0.0002175	Bergen Population	COPD GWAS	19300482
rs12915366	0.03241	Bergen Population	COPD GWAS	19300482
rs12916483	0.0316	Bergen Population	COPD GWAS	19300482
rs3813572	0.0237	Bergen Population	COPD GWAS	19300482
rs3813571	0.04084	Bergen Population	COPD GWAS	19300482
rs3813570	0.03269	Bergen Population	COPD GWAS	19300482
rs17554464	0.06848	Bergen Population	COPD GWAS	19300482
rs4886571	0.07568	Bergen Population	COPD GWAS	19300482
rs2292117	0.08375	Bergen Population	COPD GWAS	19300482
rs4887062	0.07599	Bergen Population	COPD GWAS	19300482
rs8053	0.03662	Bergen Population	COPD GWAS	19300482
rs1979906	0.09366	Bergen Population	COPD GWAS	19300482
rs4275821	0.06995	Bergen Population	COPD GWAS	19300482
rs2036527	0.0001689	Bergen Population	COPD GWAS	19300482
rs667282	0.05714	Bergen Population	COPD GWAS	19300482
rs6495306	0.03065	Bergen Population	COPD GWAS	19300482
rs601079	0.02255	Bergen Population	COPD GWAS	19300482
rs621849	0.06576	Bergen Population	COPD GWAS	19300482
rs16969968	0.0008767	Bergen Population	COPD GWAS	19300482
rs1051730	0.0001578	Bergen Population	COPD GWAS	19300482
rs1317286	0.0001392	Bergen Population	COPD GWAS	19300482
rs3743075	0.1121	Bergen Population	COPD GWAS	19300482
rs3743074	0.1397	Bergen Population	COPD GWAS	19300482
rs8192475	0.1363	Bergen Population	COPD GWAS	19300482
rs2067808	0.187	Bergen Population	COPD GWAS	19300482
rs6495309	0.1316	Bergen Population	COPD GWAS	19300482
rs1948	0.179	Bergen Population	COPD GWAS	19300482
rs7178270	0.03691	Bergen Population	COPD GWAS	19300482
rs950776	0.2253	Bergen Population	COPD GWAS	19300482
rs11637890	0.07183	Bergen Population	COPD GWAS	19300482
rs3971872	0.9057	Bergen Population	COPD GWAS	19300482
rs1996371	0.05274	Bergen Population	COPD GWAS	19300482
rs12594550	0.5063	ICGN Populaion	COPD GWAS	19300482
rs8032156	0.7332	ICGN Populaion	COPD GWAS	19300482
rs1021071	0.03397	ICGN Populaion	COPD GWAS	19300482
rs4887077	0.0789	ICGN Populaion	COPD GWAS	19300482
rs11072793	0.3325	ICGN Populaion	COPD GWAS	19300482
rs7182567	0.3908	ICGN Populaion	COPD GWAS	19300482
rs8024939	0.6295	ICGN Populaion	COPD GWAS	19300482
rs1021069	0.6711	ICGN Populaion	COPD GWAS	19300482
rs1994017	0.1317	ICGN Populaion	COPD GWAS	19300482
rs2277547	0.4139	ICGN Populaion	COPD GWAS	19300482
rs2277545	0.03776	ICGN Populaion	COPD GWAS	19300482
rs3743057	0.06403	ICGN Populaion	COPD GWAS	19300482
rs3825807	0.02937	ICGN Populaion	COPD GWAS	19300482
rs7182809	0.1047	ICGN Populaion	COPD GWAS	19300482
rs4275821	0.06995	ICGN Populaion	COPD GWAS	19300482
rs2036527	0.0001689	ICGN Populaion	COPD GWAS	19300482
rs667282	0.05714	ICGN Populaion	COPD GWAS	19300482
rs6495306	0.03065	ICGN Populaion	COPD GWAS	19300482
rs601079	0.02255	ICGN Populaion	COPD GWAS	19300482
rs621849	0.06576	ICGN Populaion	COPD GWAS	19300482
rs16969968	0.0008767	ICGN Populaion	COPD GWAS	19300482
rs1051730	0.0001578	ICGN Populaion	COPD GWAS	19300482
rs1317286	0.0001392	ICGN Populaion	COPD GWAS	19300482
rs3743075	0.1121	ICGN Populaion	COPD GWAS	19300482
rs3743074	0.1397	ICGN Populaion	COPD GWAS	19300482
rs8192475	0.1363	ICGN Populaion	COPD GWAS	19300482
rs2067808	0.187	ICGN Populaion	COPD GWAS	19300482
rs6495309	0.1316	ICGN Populaion	COPD GWAS	19300482
rs1948	0.179	ICGN Populaion	COPD GWAS	19300482
rs7178270	0.03691	ICGN Populaion	COPD GWAS	19300482
rs950776	0.2253	ICGN Populaion	COPD GWAS	19300482
rs11637890	0.07183	ICGN Populaion	COPD GWAS	19300482
rs3971872	0.9057		COPD GWAS	19300482
rs1996371	0.05274	ICGN Populaion	COPD GWAS	19300482
rs8034191	0.0001584	ICGN Populaion	COPD GWAS	19300482
rs8034191	0.0002	Bergen Population	COPD GWAS	19300482
rs1051730	0.0004	Bergen Population	COPD GWAS	19300482
rs9686327	1.36x10 -6	Bergen Population	COPD GWAS	19300482
rs735243	3.10Ex10 -6	Bergen Population	COPD GWAS	19300482
rs6720264	3.30x10 -5	Bergen Population	COPD GWAS	19300482
rs1828591	0.002	Bergen Population	COPD GWAS	19300482
rs13118928	0.002	Bergen Population	COPD GWAS	19300482
rs2488825	0.0003	Bergen Population	COPD GWAS	19300482
rs8034191	7.86 × 10 -7	ICGN Populaion	COPD GWAS	19300482
rs1051730	1.40 × 10 -6	ICGN Populaion	COPD GWAS	19300482
rs9686327	0.035	ICGN Populaion	COPD GWAS	19300482
rs735243	0.044	ICGN Populaion	COPD GWAS	19300482
rs6720264	0.022	ICGN Populaion	COPD GWAS	19300482
rs1828591	0.015	ICGN Populaion	COPD GWAS	19300482
rs13118928	0.017	ICGN Populaion	COPD GWAS	19300482
rs2488825	0.041	ICGN Populaion	COPD GWAS	19300482
rs7531867	0.006	European Americans	COPD	19196818
rs1805096	0.007	European Americans	COPD	19196818
rs1892535	0.018	European Americans	COPD	19196818
rs6588153	0.007	European Americans	COPD	19196818
rs1938484	0.007	European Americans	COPD	19196818
rs8179183	0.429	European Americans	COPD	19196818
rs3790419	0.473	European Americans	COPD	19196818
rs3828034	0.848	European Americans	COPD	19196818
rs12564626	0.015	European Americans	COPD	19196818
rs10443259	0.004	European Americans	COPD	19196818
rs6691346	0.004	European Americans	COPD	19196818
rs4655680	0.007	European Americans	COPD	19196818
rs1137100	0.005	European Americans	COPD	19196818
rs10889562	0.73	European Americans	COPD	19196818
rs6702028	0.006	European Americans	COPD	19196818
rs1782763	0.003	European Americans	COPD	19196818
rs1171265	0.004	European Americans	COPD	19196818
rs1171271	0.006	European Americans	COPD	19196818
rs1782754	0.006	European Americans	COPD	19196818
rs1171279	0.425	European Americans	COPD	19196818
rs1171274	0.004	European Americans	COPD	19196818
rs10889558	0.007	European Americans	COPD	19196818
rs6694528	0.818	European Americans	COPD	19196818
rs1327121	0.033	European Americans	COPD	19196818
rs17412682	0.027	European Americans	COPD	19196818
rs2025804	0.022	European Americans	COPD	19196818
rs17127652	0.518	European Americans	COPD	19196818
rs4655811	0.055	European Americans	COPD	19196818
rs6657868	0.06	European Americans	COPD	19196818
rs9436746	0.039	European Americans	COPD	19196818
rs970468	0.068	European Americans	COPD	19196818
rs17097182	0.983	European Americans	COPD	19196818
rs1045895	0.111	European Americans	COPD	19196818
rs9436299	0.059	European Americans	COPD	19196818
rs1327118	0.231	European Americans	COPD	19196818
rs10493377	0.373	European Americans	COPD	19196818
rs1800797	0.006	Rate of FEV1 of LHS	COPD	19359268
rs1554606	0.011	Rate of FEV1 of LHS	COPD	19359268
rs2069845	0.007	Rate of FEV1 of LHS	COPD	19359268
rs2069825	0.001	Rate of FEV1 of LHS	COPD	19359268
rs2069840	0.005	Rate of FEV1 of LHS	COPD	19359268
rs1818879	0.012	Rate of FEV1 of LHS	COPD	19359268
rs2069827	0.786	Rate of FEV1 of LHS	COPD	19359268
rs2069825	0.424	Lung Health Study	COPD	19359268
rs2069827	0.997	Lung Health Study	COPD	19359268
rs1800795	0.486	Lung Health Study	COPD	19359268
rs2069840	0.82	Lung Health Study	COPD	19359268
rs1554606	0.542	Lung Health Study	COPD	19359268
rs2069845	0.819	Lung Health Study	COPD	19359268
rs1818879	0.877	Lung Health Study	COPD	19359268
rs1903003	7.18×10−8	Primary	COPD	20173748
rs7671167	8.59 ×10−8	Primary	COPD	20173748
rs2869967	1.48 ×10−6	Primary	COPD	20173748
rs1903003	7.19×10−3	COPDGene	COPD	20173748
rs7671167	3.93×10−3	COPDGene	COPD	20173748
rs2869967	1.72×10−2	COPDGene	COPD	20173748
rs1903003	0.48	EOCOPD	COPD	20173748
rs7671167	0.11	EOCOPD	COPD	20173748
rs1903003	1.29×10−3	ICGN	COPD	20173748
rs7671167	5.15×10−4	ICGN	COPD	20173748
rs1051730	0.00011	current CPD	COPD	21685187
rs1801272	2.78×10−5	current CPD	COPD	21685187
rs3025343	0.015	smoking cessation	COPD	21685187
rs902	0.5	EOCOPD	Pulmonary Emphysema	19131638
rs2765889	1	EOCOPD	Pulmonary Emphysema	19131638
rs2296621	0.005	EOCOPD	Pulmonary Emphysema	19131638
rs1805113	0.7	EOCOPD	Pulmonary Emphysema	19131638
rs2291477	0.06	EOCOPD	Pulmonary Emphysema	19131638
rs1805112	0.046	EOCOPD	Pulmonary Emphysema	19131638
rs2306886	0.9	EOCOPD	Pulmonary Emphysema	19131638
rs1805110	0.02	EOCOPD	Pulmonary Emphysema	19131638
rs902	0.02	NETT-NAS	Pulmonary Emphysema	19131638
rs2765889	0.01	NETT-NAS	Pulmonary Emphysema	19131638
rs2296621	0.04	NETT-NAS	Pulmonary Emphysema	19131638
rs1805113	0.2	NETT-NAS	Pulmonary Emphysema	19131638
rs2291477	0.03	NETT-NAS	Pulmonary Emphysema	19131638
rs1805112	0.2	NETT-NAS	Pulmonary Emphysema	19131638
rs2306886	0.8	NETT-NAS	Pulmonary Emphysema	19131638
rs1805110	0.03	NETT-NAS	Pulmonary Emphysema	19131638
rs902	0.6	ICGN	Pulmonary Emphysema	19131638
rs2765889	0.1	ICGN	Pulmonary Emphysema	19131638
rs2296621	0.004	ICGN	Pulmonary Emphysema	19131638
rs1805113	0.002	ICGN	Pulmonary Emphysema	19131638
rs2291477	0.01	ICGN	Pulmonary Emphysema	19131638
rs1805112	0.6	ICGN	Pulmonary Emphysema	19131638
rs2306886	0.3	ICGN	Pulmonary Emphysema	19131638
rs1805110	0.9	ICGN	Pulmonary Emphysema	19131638
rs12026758	0.2		Pulmonary Emphysema	19131638
rs2810894	0.7		Pulmonary Emphysema	19131638
rs1804506	0.7		Pulmonary Emphysema	19131638
rs6604050	0.5		Pulmonary Emphysema	19131638
rs2765887	0.8		Pulmonary Emphysema	19131638
rs2765889	1		Pulmonary Emphysema	19131638
rs6660484	0.3		Pulmonary Emphysema	19131638
rs1805113	0.9		Pulmonary Emphysema	19131638
rs7532589	0.4		Pulmonary Emphysema	19131638
rs11578802	0.5		Pulmonary Emphysema	19131638
rs923378	0.6		Pulmonary Emphysema	19131638
rs4658112	0.8		Pulmonary Emphysema	19131638
rs284170	0.03		Pulmonary Emphysema	19131638
rs7529421	0.8		Pulmonary Emphysema	19131638
rs284176	0.3		Pulmonary Emphysema	19131638
rs12044500	0.1		Pulmonary Emphysema	19131638
rs6700529	0.7		Pulmonary Emphysema	19131638
rs1473486	0.4		Pulmonary Emphysema	19131638
rs4658270	0.2		Pulmonary Emphysema	19131638
rs284165	0.4		Pulmonary Emphysema	19131638
rs10493859	0.2		Pulmonary Emphysema	19131638
rs10874996	0.04		Pulmonary Emphysema	19131638
rs2129972	0.02		Pulmonary Emphysema	19131638
rs6686126	0.3		Pulmonary Emphysema	19131638
rs17575497	0.2		Pulmonary Emphysema	19131638
rs2634028	0.02		Pulmonary Emphysema	19131638
rs2046737	0.02		Pulmonary Emphysema	19131638
rs12727153	0.005		Pulmonary Emphysema	19131638
rs6656018	0.7		Pulmonary Emphysema	19131638
rs1192524	0.6		Pulmonary Emphysema	19131638
rs6680463	0.3		Pulmonary Emphysema	19131638
rs12566180	0.3		Pulmonary Emphysema	19131638
rs12141128	0.3		Pulmonary Emphysema	19131638
rs2770186	0.3		Pulmonary Emphysema	19131638
rs883873	0.06		Pulmonary Emphysema	19131638
rs902	0.7	EOCOPD	Pulmonary Emphysema	19131638
rs6693438	1	EOCOPD	Pulmonary Emphysema	19131638
rs2765889	0.9	EOCOPD	Pulmonary Emphysema	19131638
rs2296621	0.006	EOCOPD	Pulmonary Emphysema	19131638
rs284878	1	EOCOPD	Pulmonary Emphysema	19131638
rs6662887	1	EOCOPD	Pulmonary Emphysema	19131638
rs284868	0.6	EOCOPD	Pulmonary Emphysema	19131638
rs284869	0.6	EOCOPD	Pulmonary Emphysema	19131638
rs11165300	0.9	EOCOPD	Pulmonary Emphysema	19131638
rs1805113	0.6	EOCOPD	Pulmonary Emphysema	19131638
rs1750641	0.7	EOCOPD	Pulmonary Emphysema	19131638
rs1613413	0.6	EOCOPD	Pulmonary Emphysema	19131638
rs2291477	0.1	EOCOPD	Pulmonary Emphysema	19131638
rs4658260	0.9	EOCOPD	Pulmonary Emphysema	19131638
rs4658261	0.9	EOCOPD	Pulmonary Emphysema	19131638
rs7524066	0.2	EOCOPD	Pulmonary Emphysema	19131638
rs2279455	0.8	EOCOPD	Pulmonary Emphysema	19131638
rs1805112	0.1	EOCOPD	Pulmonary Emphysema	19131638
rs10157635	1	EOCOPD	Pulmonary Emphysema	19131638
rs10157887	0.5	EOCOPD	Pulmonary Emphysema	19131638
rs6685808	0.2	EOCOPD	Pulmonary Emphysema	19131638
rs10783002	0.6	EOCOPD	Pulmonary Emphysema	19131638
rs10783003	0.02	EOCOPD	Pulmonary Emphysema	19131638
rs11466583	0.8	EOCOPD	Pulmonary Emphysema	19131638
rs2306886	0.8	EOCOPD	Pulmonary Emphysema	19131638
rs2306887	0.6	EOCOPD	Pulmonary Emphysema	19131638
rs284176	0.04	EOCOPD	Pulmonary Emphysema	19131638
rs3738441	0.08	EOCOPD	Pulmonary Emphysema	19131638
rs2810904	0.9	EOCOPD	Pulmonary Emphysema	19131638
rs2297142	0.4	EOCOPD	Pulmonary Emphysema	19131638
rs11466567	0.05	EOCOPD	Pulmonary Emphysema	19131638
rs11165637	0.7	EOCOPD	Pulmonary Emphysema	19131638
rs1017956	0.2	EOCOPD	Pulmonary Emphysema	19131638
rs1805110	0.01	EOCOPD	Pulmonary Emphysema	19131638
rs12727153	1	EOCOPD	Pulmonary Emphysema	19131638
rs7550028	0.4	EOCOPD	Pulmonary Emphysema	19131638
rs10875040	1	EOCOPD	Pulmonary Emphysema	19131638
rs2235970	0.02	EOCOPD	Pulmonary Emphysema	19131638
rs6687387	0.7	EOCOPD	Pulmonary Emphysema	19131638
rs769211	0.09	EOCOPD	Pulmonary Emphysema	19131638
rs12140446	0.4	EOCOPD	Pulmonary Emphysema	19131638
rs2301022	0.4	EOCOPD	Pulmonary Emphysema	19131638
rs902	0.02	NETT-NAS	Pulmonary Emphysema	19131638
rs6693438	0.6	NETT-NAS	Pulmonary Emphysema	19131638
rs2765889	0.01	NETT-NAS	Pulmonary Emphysema	19131638
rs2296621	0.04	NETT-NAS	Pulmonary Emphysema	19131638
rs284878	0.1	NETT-NAS	Pulmonary Emphysema	19131638
rs6662887	0.3	NETT-NAS	Pulmonary Emphysema	19131638
rs284868	0.2	NETT-NAS	Pulmonary Emphysema	19131638
rs284869	0.2	NETT-NAS	Pulmonary Emphysema	19131638
rs11165300	0.5	NETT-NAS	Pulmonary Emphysema	19131638
rs1805113	0.2	NETT-NAS	Pulmonary Emphysema	19131638
rs1750641	0.3	NETT-NAS	Pulmonary Emphysema	19131638
rs1613413	0.09	NETT-NAS	Pulmonary Emphysema	19131638
rs2291477	0.03	NETT-NAS	Pulmonary Emphysema	19131638
rs4658260	0.6	NETT-NAS	Pulmonary Emphysema	19131638
rs4658261	0.7	NETT-NAS	Pulmonary Emphysema	19131638
rs7524066	0.07	NETT-NAS	Pulmonary Emphysema	19131638
rs2279455	0.02	NETT-NAS	Pulmonary Emphysema	19131638
rs1805112	0.2	NETT-NAS	Pulmonary Emphysema	19131638
rs10157635	0.3	NETT-NAS	Pulmonary Emphysema	19131638
rs10157887	0.3	NETT-NAS	Pulmonary Emphysema	19131638
rs6685808	0.5	NETT-NAS	Pulmonary Emphysema	19131638
rs10783002	0.8	NETT-NAS	Pulmonary Emphysema	19131638
rs10783003	0.8	NETT-NAS	Pulmonary Emphysema	19131638
rs11466583	0.08	NETT-NAS	Pulmonary Emphysema	19131638
rs2306886	0.8	NETT-NAS	Pulmonary Emphysema	19131638
rs2306887	0.7	NETT-NAS	Pulmonary Emphysema	19131638
rs284176	1	NETT-NAS	Pulmonary Emphysema	19131638
rs3738441	0.5	NETT-NAS	Pulmonary Emphysema	19131638
rs2810904	0.9	NETT-NAS	Pulmonary Emphysema	19131638
rs2297142	0.3	NETT-NAS	Pulmonary Emphysema	19131638
rs11466567	0.2	NETT-NAS	Pulmonary Emphysema	19131638
rs11165637	0.9	NETT-NAS	Pulmonary Emphysema	19131638
rs1017956	0.3	NETT-NAS	Pulmonary Emphysema	19131638
rs1805110	0.03	NETT-NAS	Pulmonary Emphysema	19131638
rs12727153	0.4	NETT-NAS	Pulmonary Emphysema	19131638
rs7550028	0.5	NETT-NAS	Pulmonary Emphysema	19131638
rs10875040	0.3	NETT-NAS	Pulmonary Emphysema	19131638
rs2235970	0.6	NETT-NAS	Pulmonary Emphysema	19131638
rs6687387	1	NETT-NAS	Pulmonary Emphysema	19131638
rs769211	0.7	NETT-NAS	Pulmonary Emphysema	19131638
rs12140446	0.4	NETT-NAS	Pulmonary Emphysema	19131638
rs2301022	0.5	NETT-NAS	Pulmonary Emphysema	19131638
rs8034191	1e-10	GWAS of chronic obstructive pulmonary disease	COPD	HGVST144
rs1828591	1e-07	GWAS of chronic obstructive pulmonary disease	COPD	HGVST144
rs7671167	1e-11	GWAS of chronic obstructive pulmonary disease	COPD	HGVST468
rs13180	2e-08	GWAS of chronic obstructive pulmonary disease	COPD	HGVST468
rs13118928	5e-07	GWAS of chronic obstructive pulmonary disease	COPD	HGVST468
rs8050136	4e-08	GWAS of chronic obstructive pulmonary disease	COPD	HGVST665
